# Supplementary material for: Surface Modification and Enhancement of Ferromagnetism in BiFeO3 Nanofilms Deposited on HOPG
Source: PubMed Central journal article supplement (PMC7600225; doi:10.3390/nano10101990), 2020-10-09

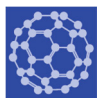

# Surface Modification and Enhancement of Ferromagnetism in BiFeO<sub>3</sub> Nanofilms Deposited on HOPG

Shikhgasan Ramazanov <sup>1</sup>, Dinara Sobola <sup>2,3,4</sup>, Farid Orudzhev <sup>4</sup>, Alexandr Knápek <sup>5</sup>, Josef Polčák <sup>3,6</sup>, Michal Potoček <sup>3,6</sup>, Pavel Kaspar <sup>2,\*</sup> and Rashid Dallaev <sup>2</sup>

<sup>1</sup> Faculty of Physics, Dagestan State University, Makhachkala, St. M. Gadjeva 43-a, 367015 Makhachkala, Russia; ramazanv@mail.ru (S.R.)

<sup>2</sup> Department of Physics, Faculty of Electrical Engineering and Communication, Brno University of Technology, Technická 2848/8, 61600 Brno, Czech Republic; sobola@vutbr.cz (D.S.); xdalla03@stud.feec.vutbr.cz (R.D.)

<sup>3</sup> Central European Institute of Technology, Brno University of Technology, Purkyňova 123, 61200 Brno, Czech Republic; josef.polcak@ceitec.vutbr.cz (J.P.); michal.potocek@ceitec.vutbr.cz (M.P.)

<sup>4</sup> Department of Inorganic Chemistry and Chemical Ecology, Dagestan State University, Makhachkala, St. M. Gadjeva 43-a, 367015 Makhachkala, Russia; farid-stkha@mail.ru

<sup>5</sup> Institute of the Scientific Instruments of the Czech Academy of Sciences v.v.i., Královopolská 147, 61264 Brno, Czech Republic; knapek@isibrno.cz

<sup>6</sup> Institute of Physical Engineering, Faculty of Mechanical Engineering, Brno University of Technology, Technická 2896/2, 61669 Brno, Czech Republic

\* Correspondence: kasparp@feec.vutbr.cz; Tel: +420-54114-6009

## 3.2. X-ray Photoelectron Spectroscopy (XPS) Analysis

Detailed description of XPS spectra of all components depending on the annealing temperature of the obtained structure Fe 2p, Bi 4f, O 1s, C 1s. The deconvolution of the peaks was carried out using Casa XPS software Version 2.3.19PR1.0 (Casa Software Ltd, Wilmslow, UK). The spectra were calibrated by C1s at 284.8 eV and we used Shirley background type and Asymmetric line-shape (LA) of component peaks.

**Table S1.** XPS spectra of Fe 2p, Bi 4f, O 1s, C 1s components depending on the annealing temperature.

|          | Fe 2p |
|----------|-------|
| T<br>(K) |       |

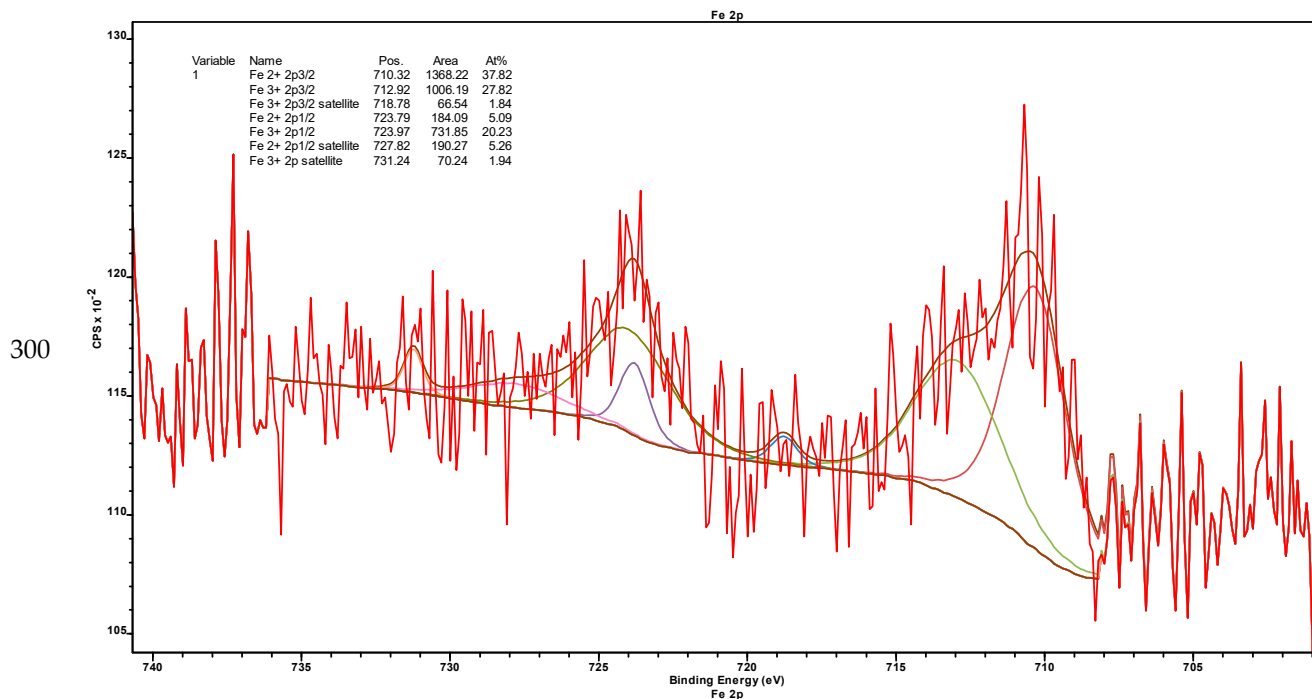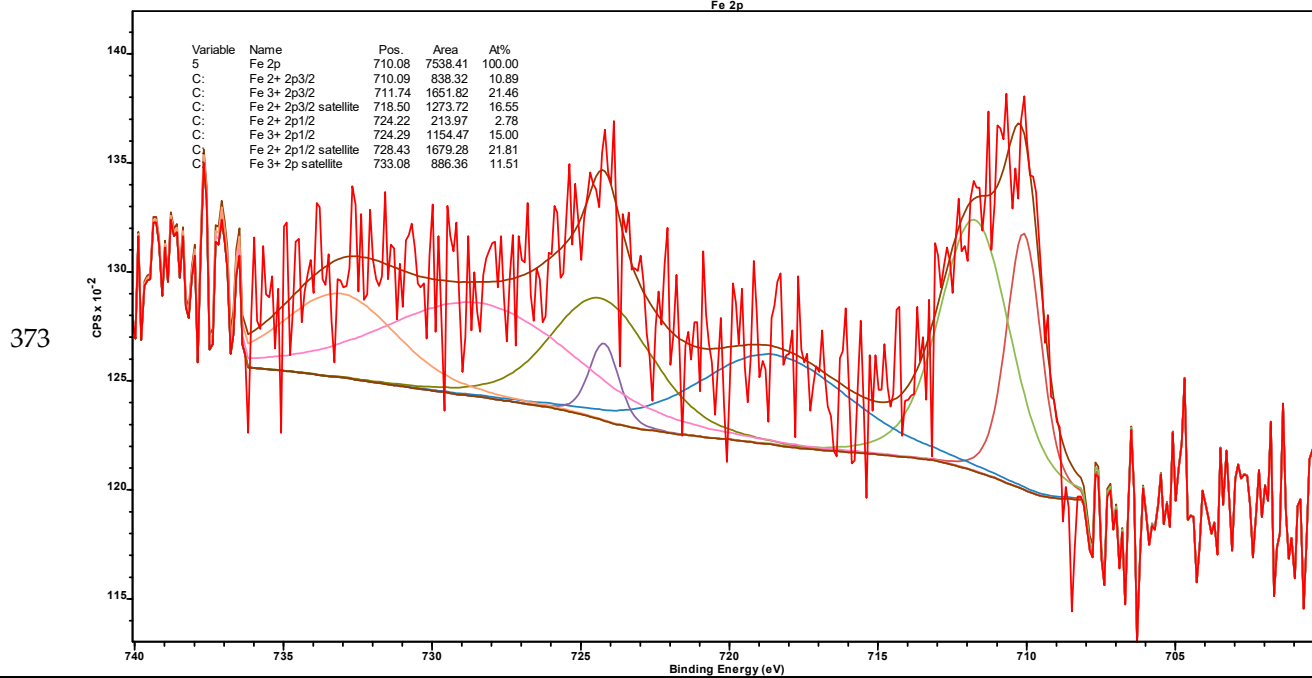

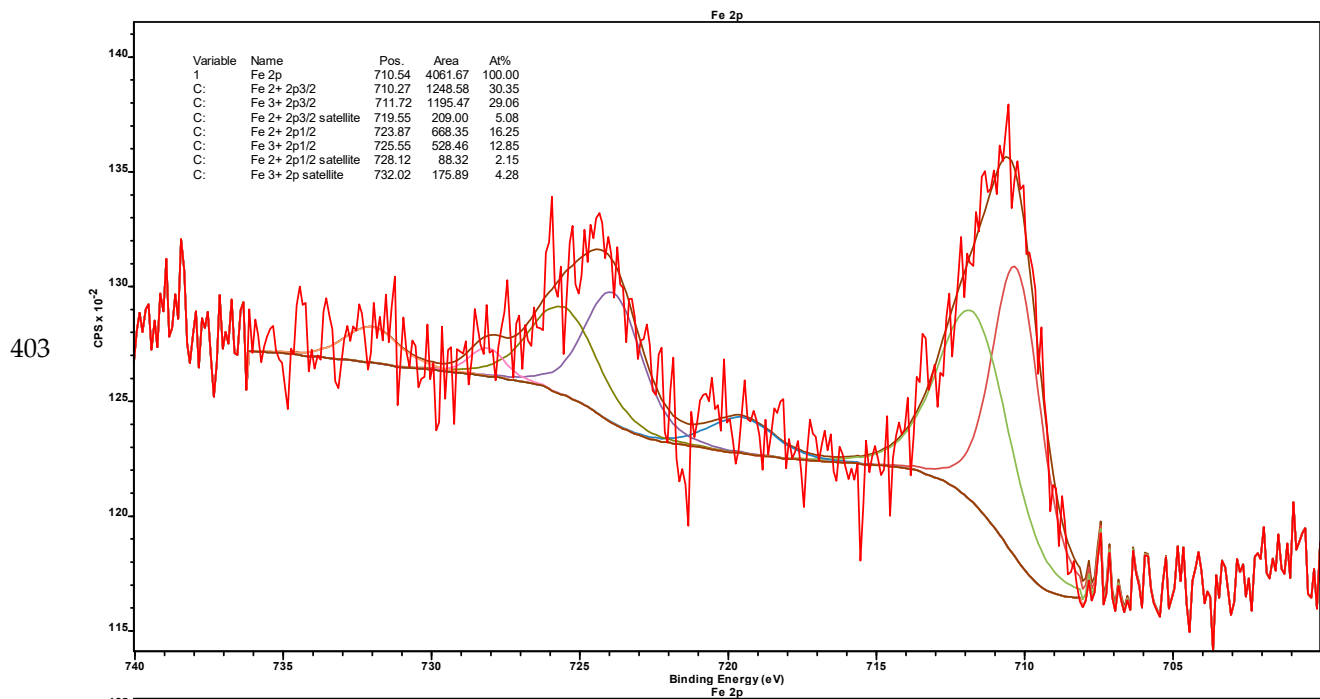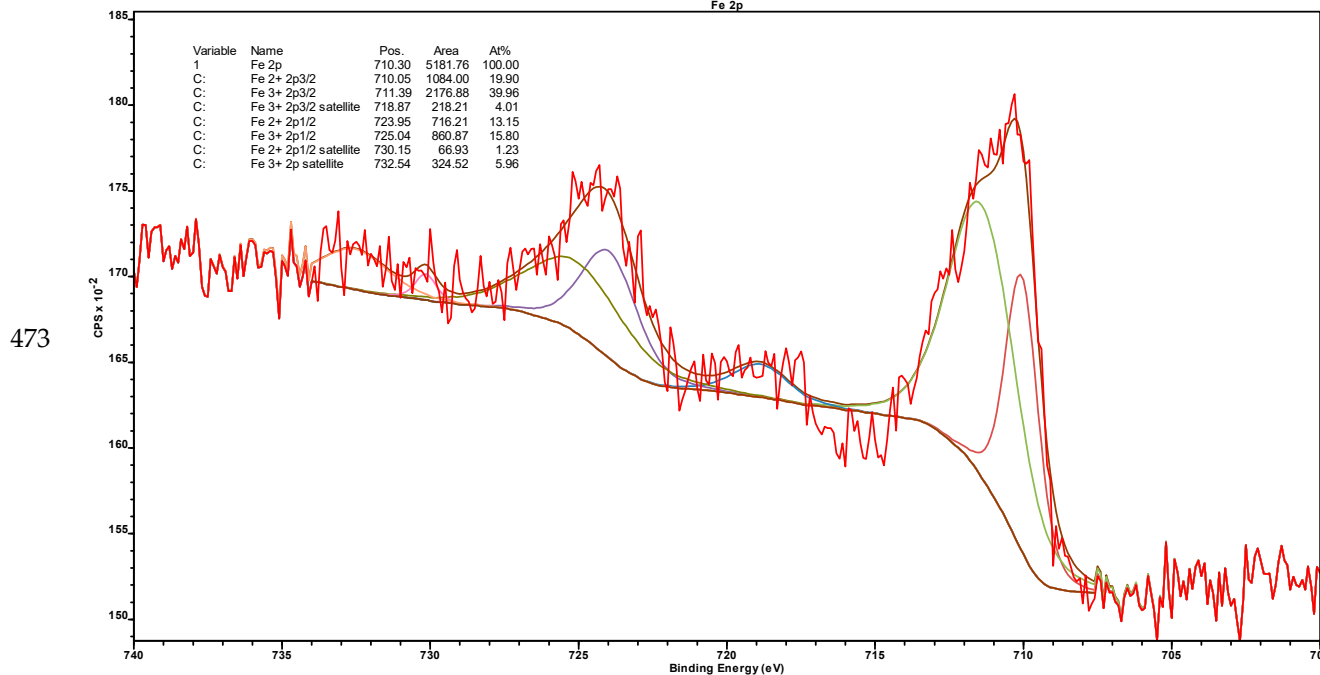

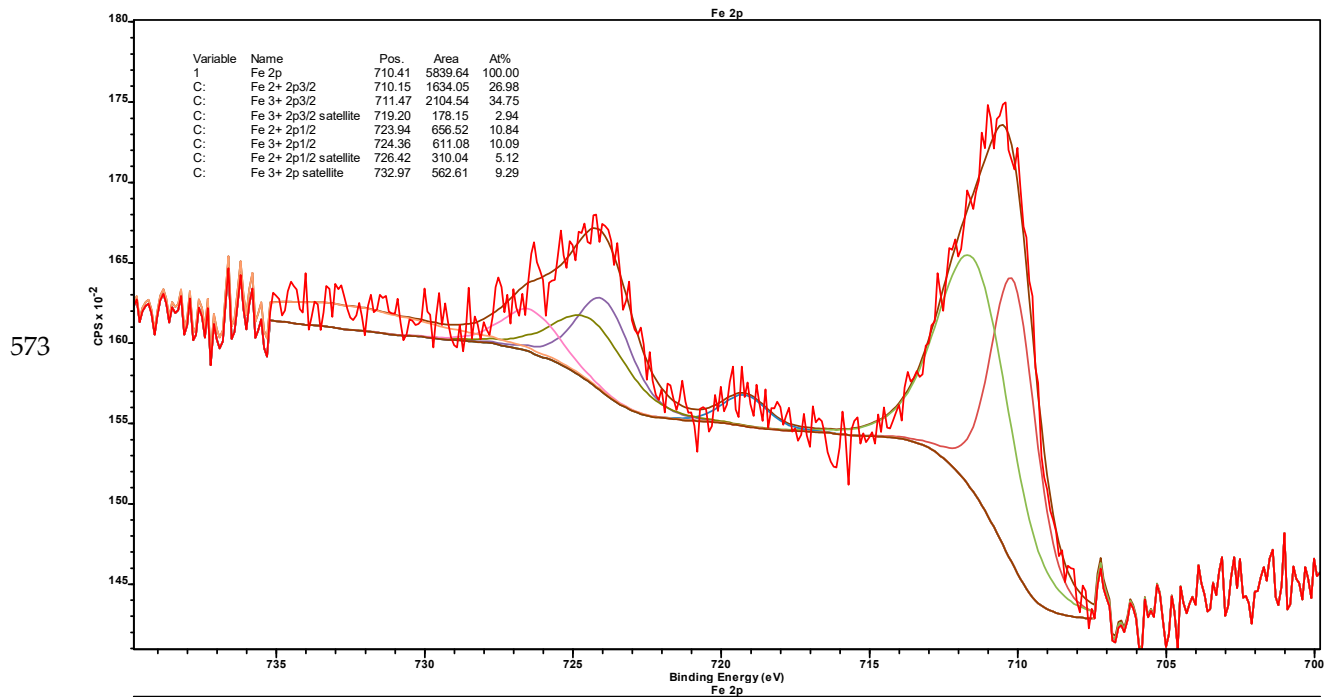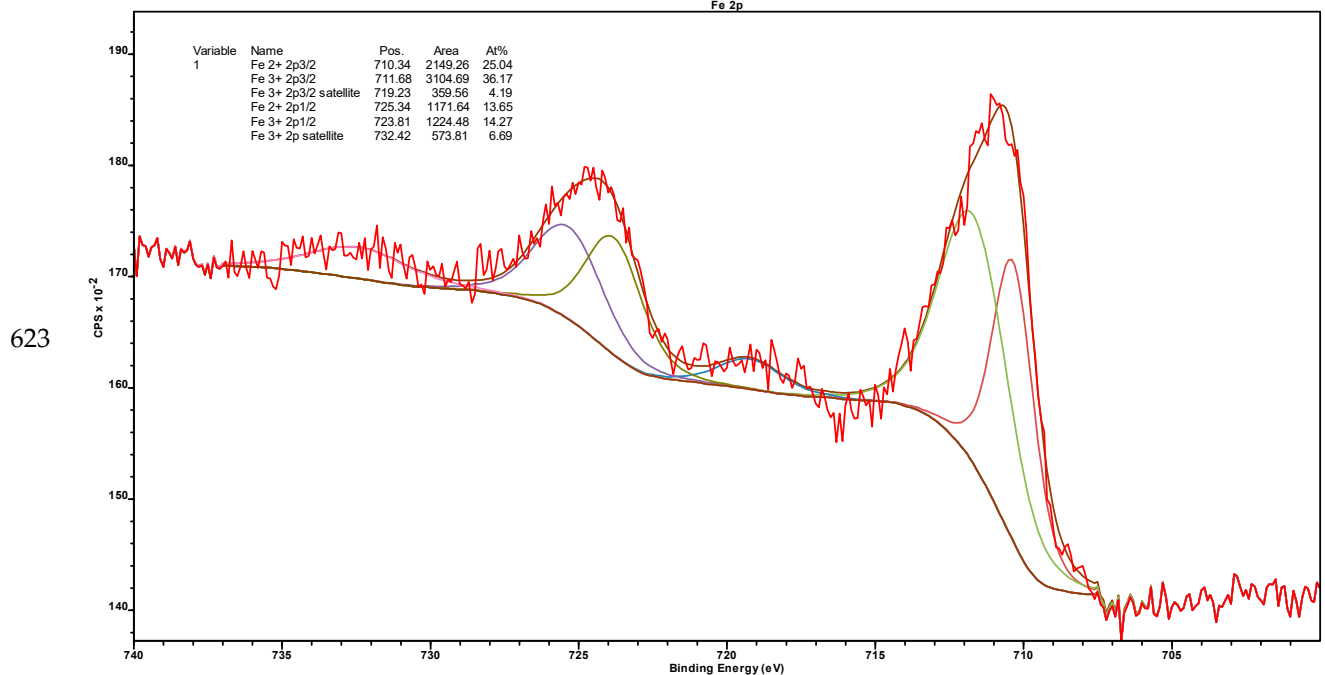

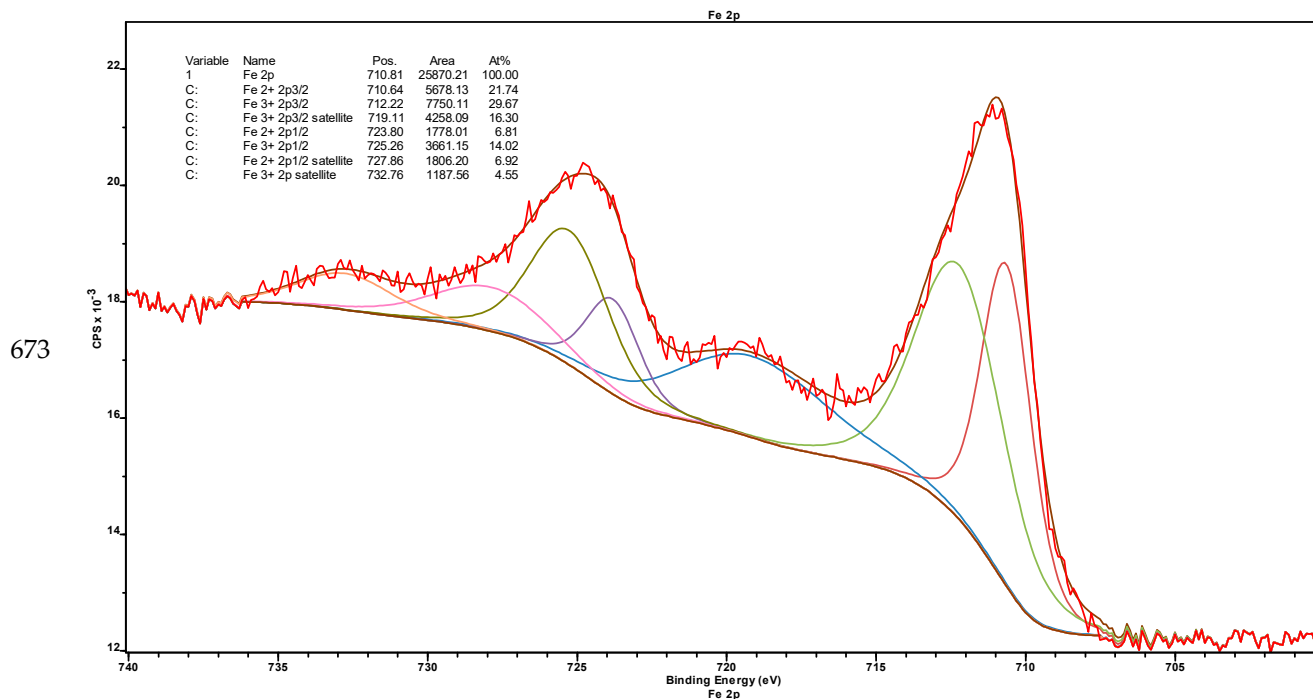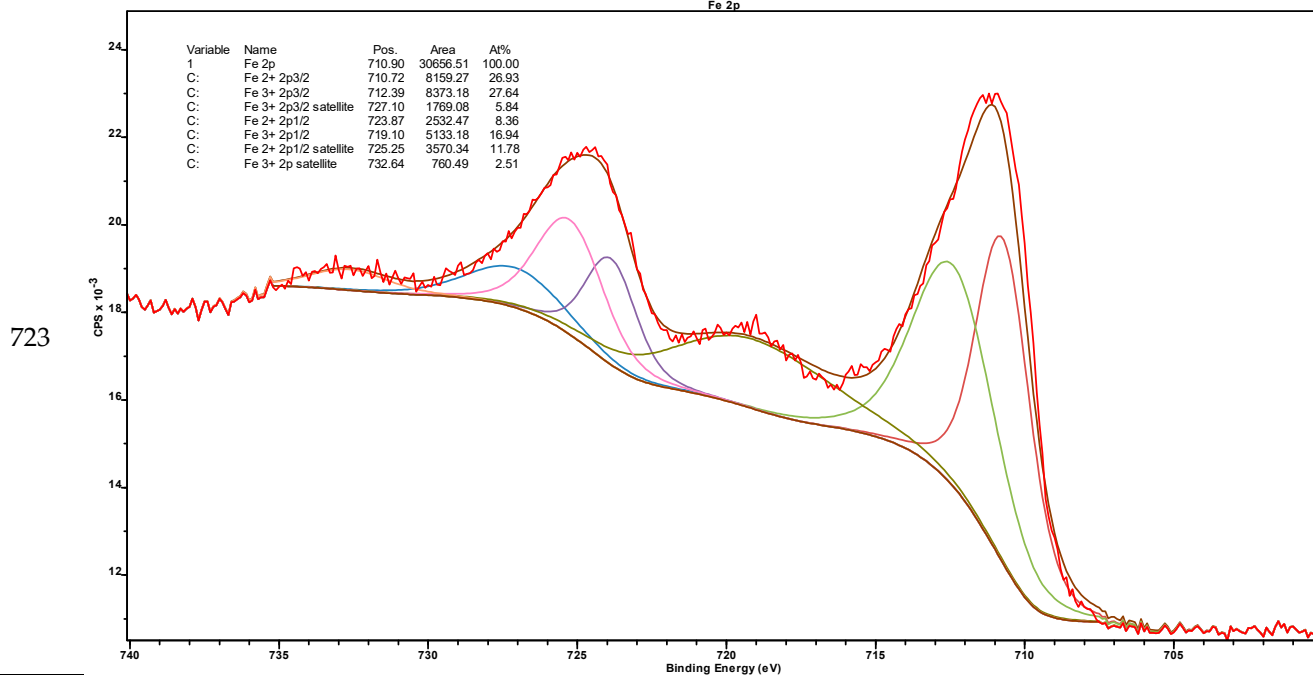

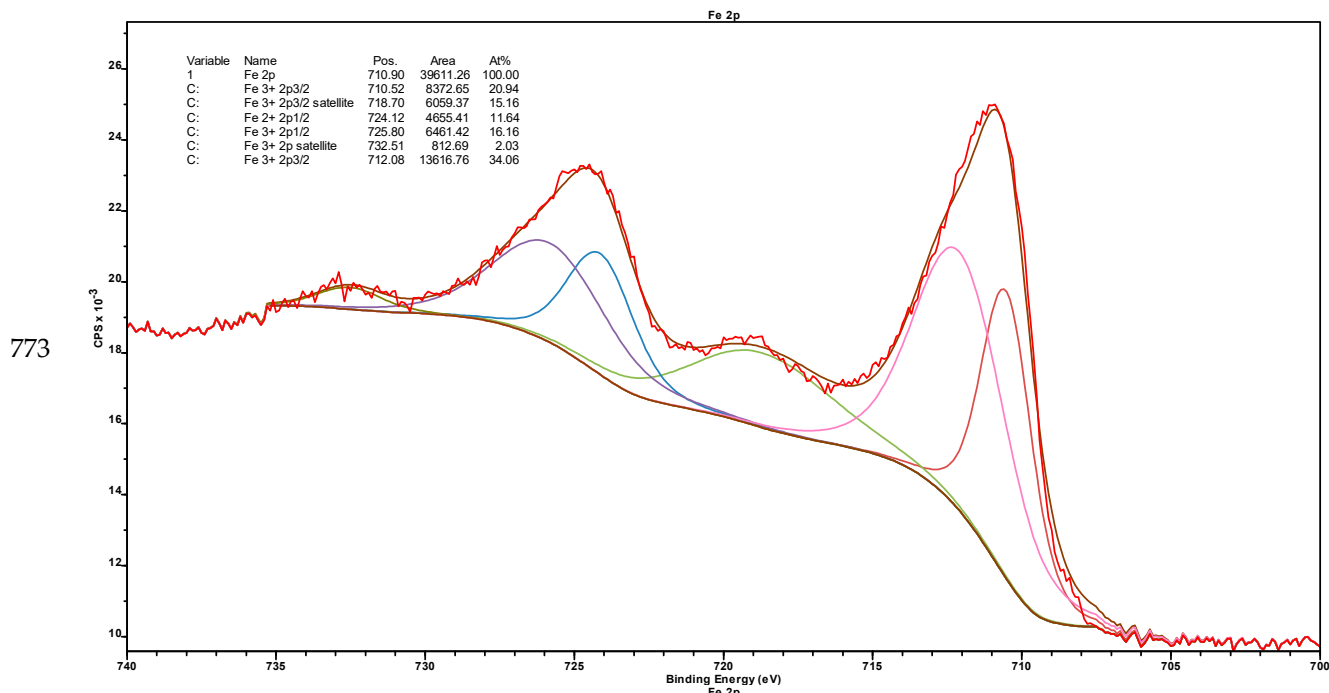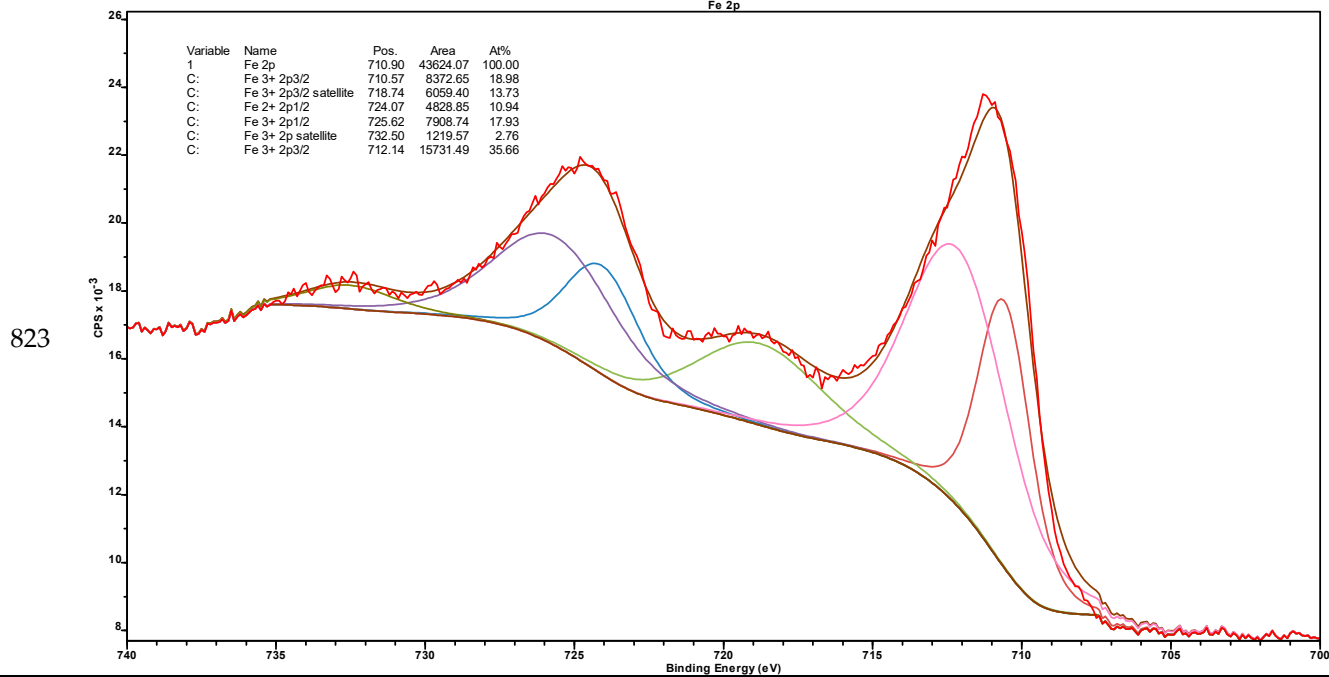

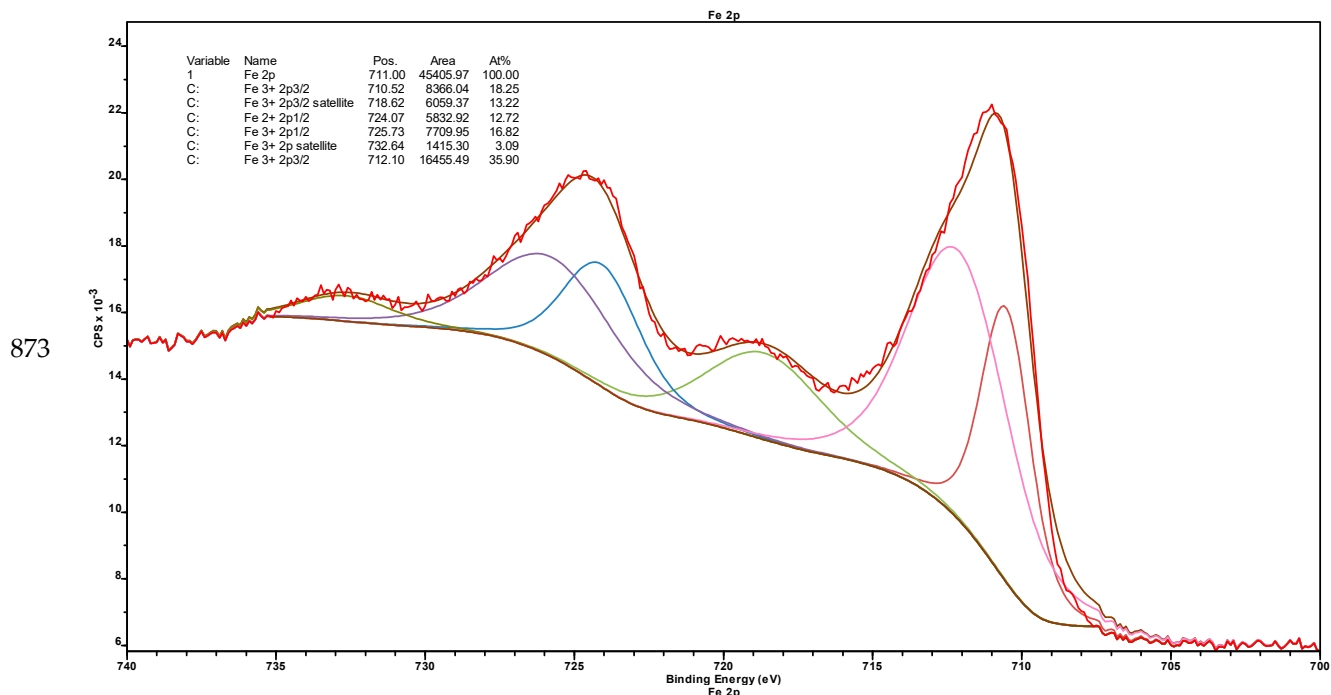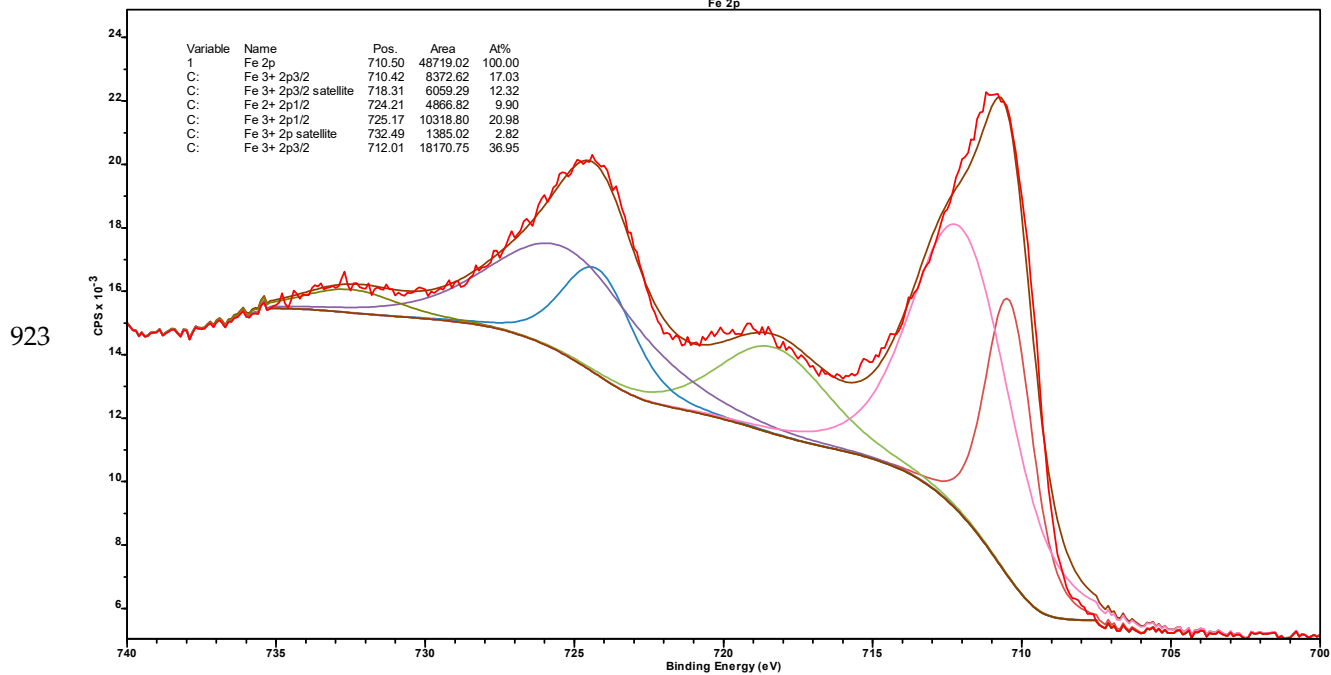

T  
(K)

Bi 4f

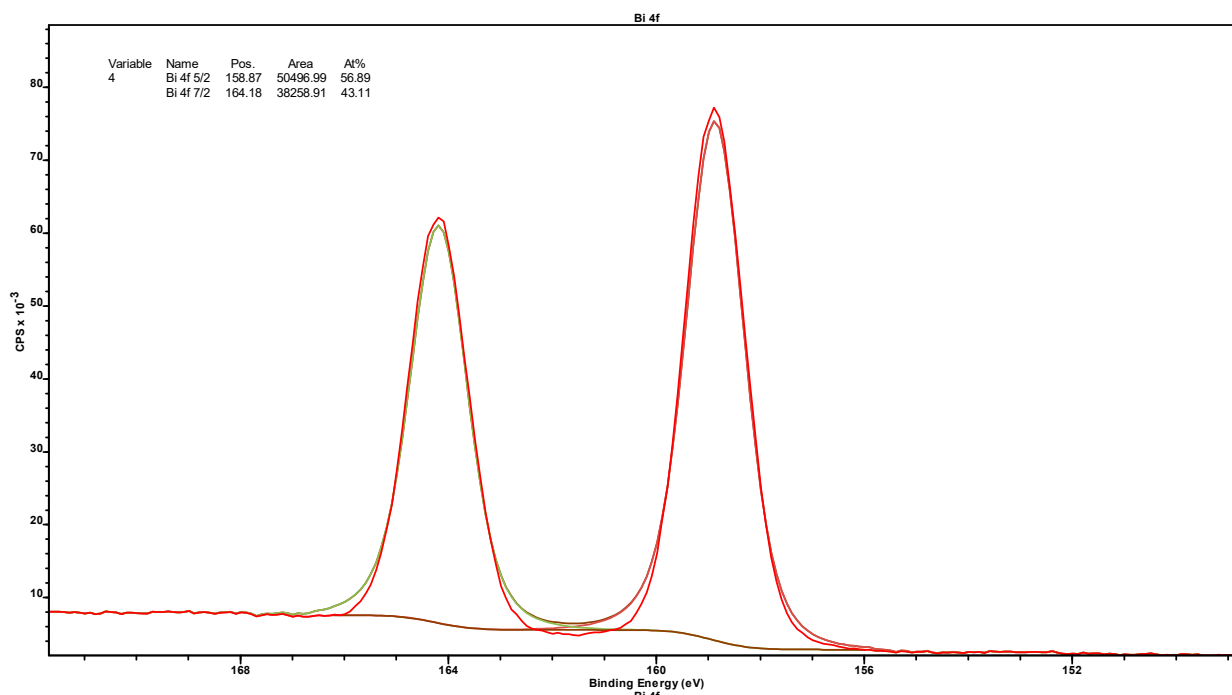

300

373

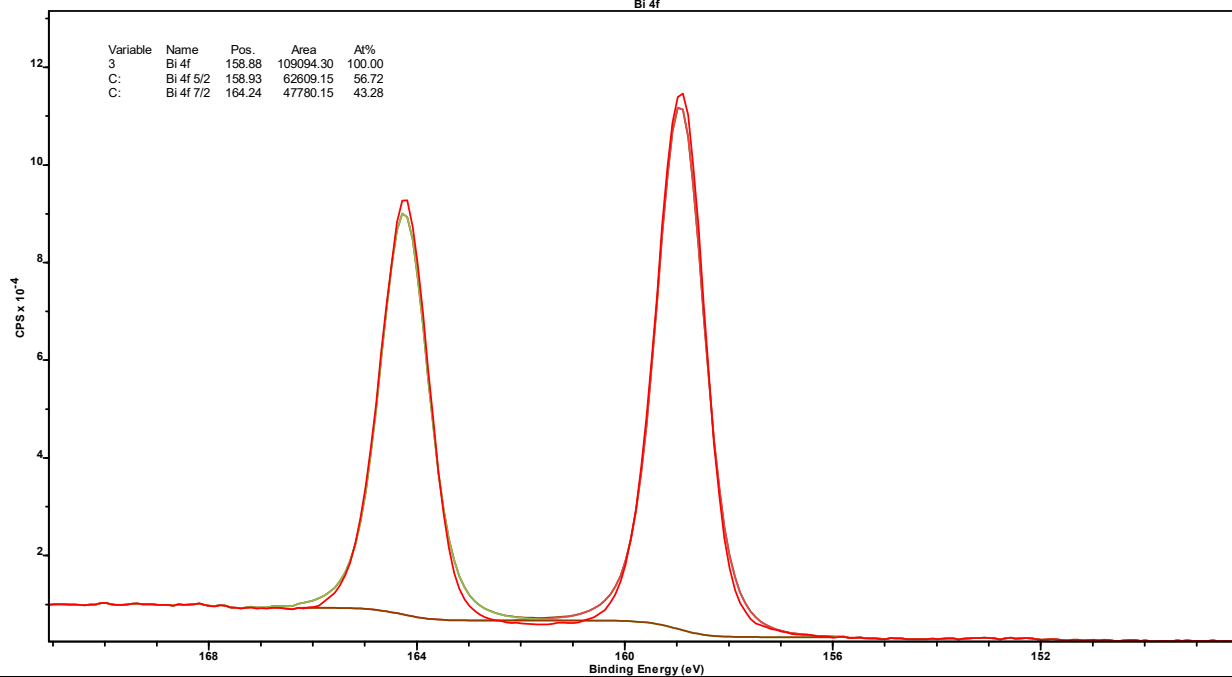



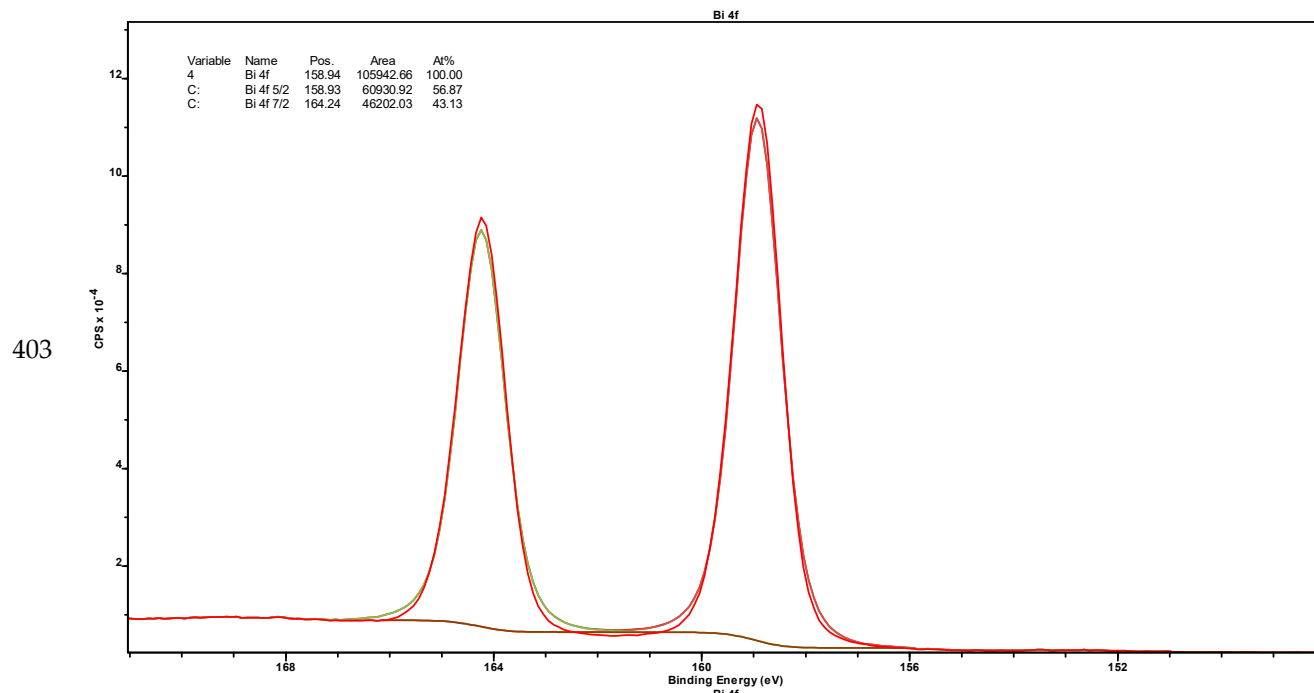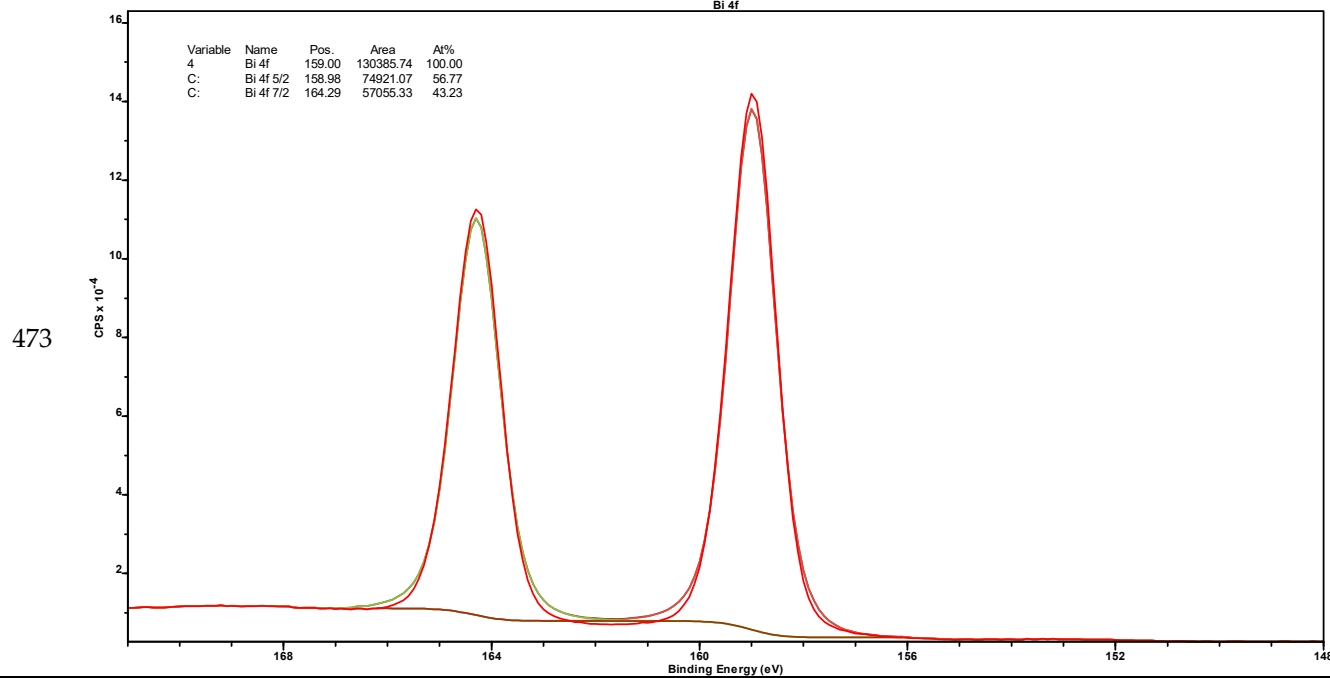

573

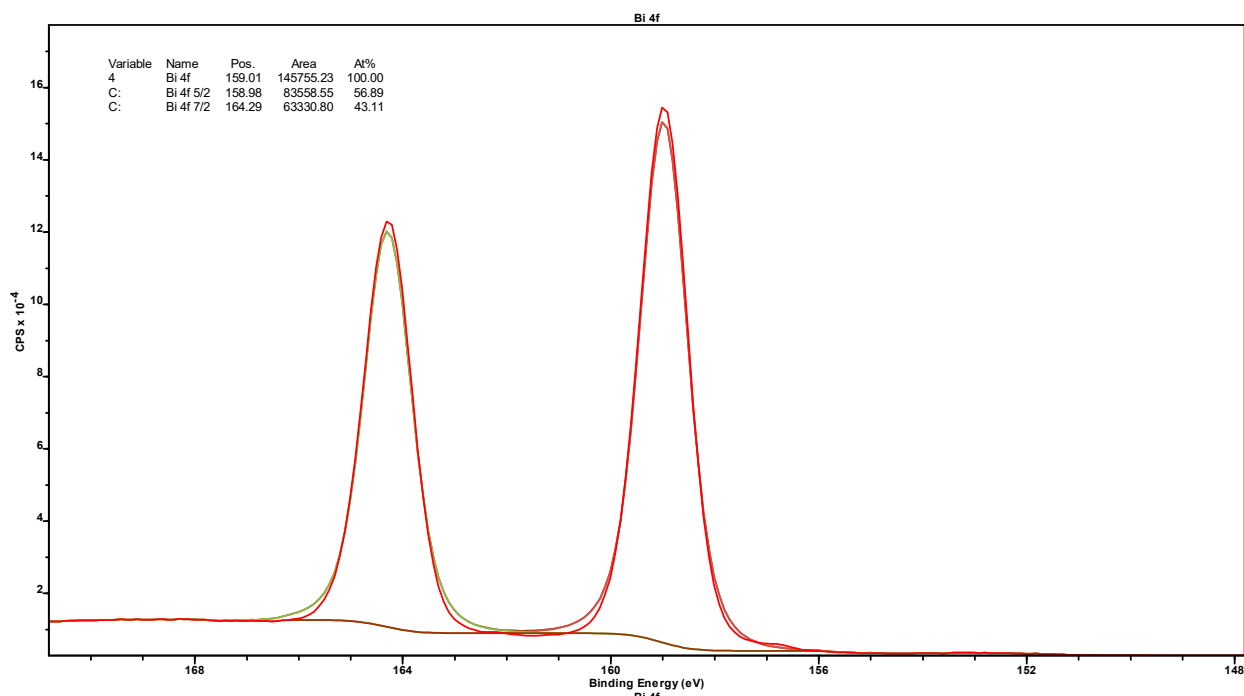

623

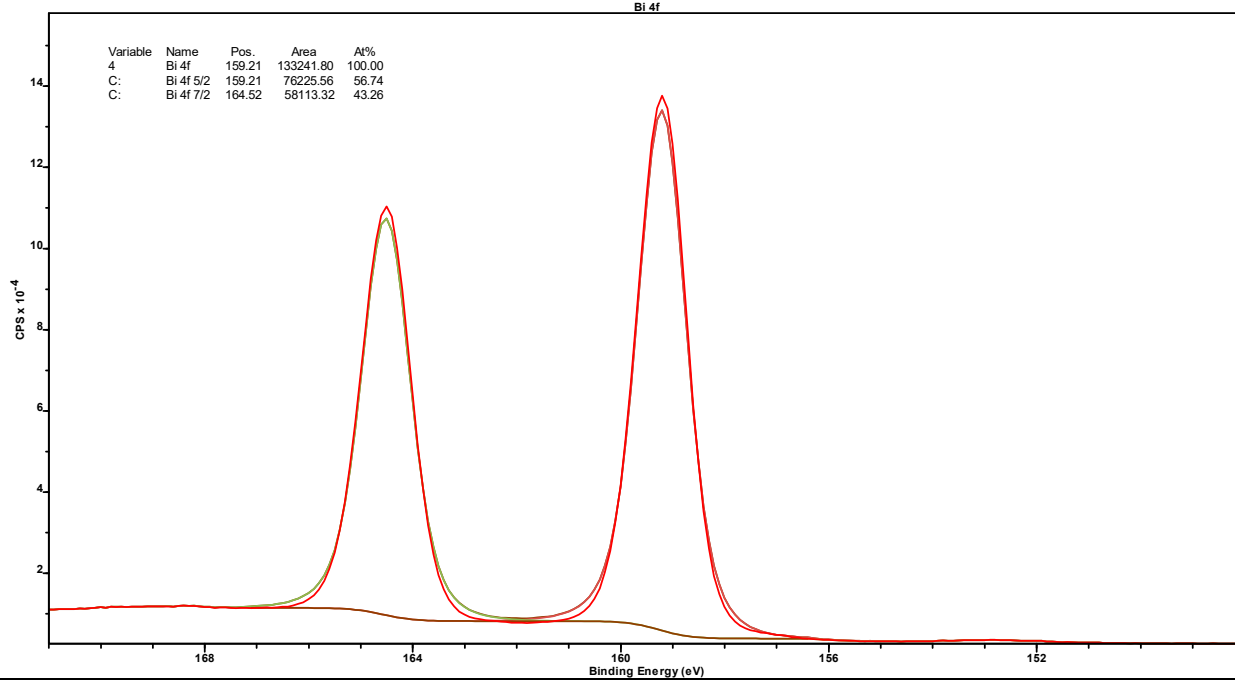

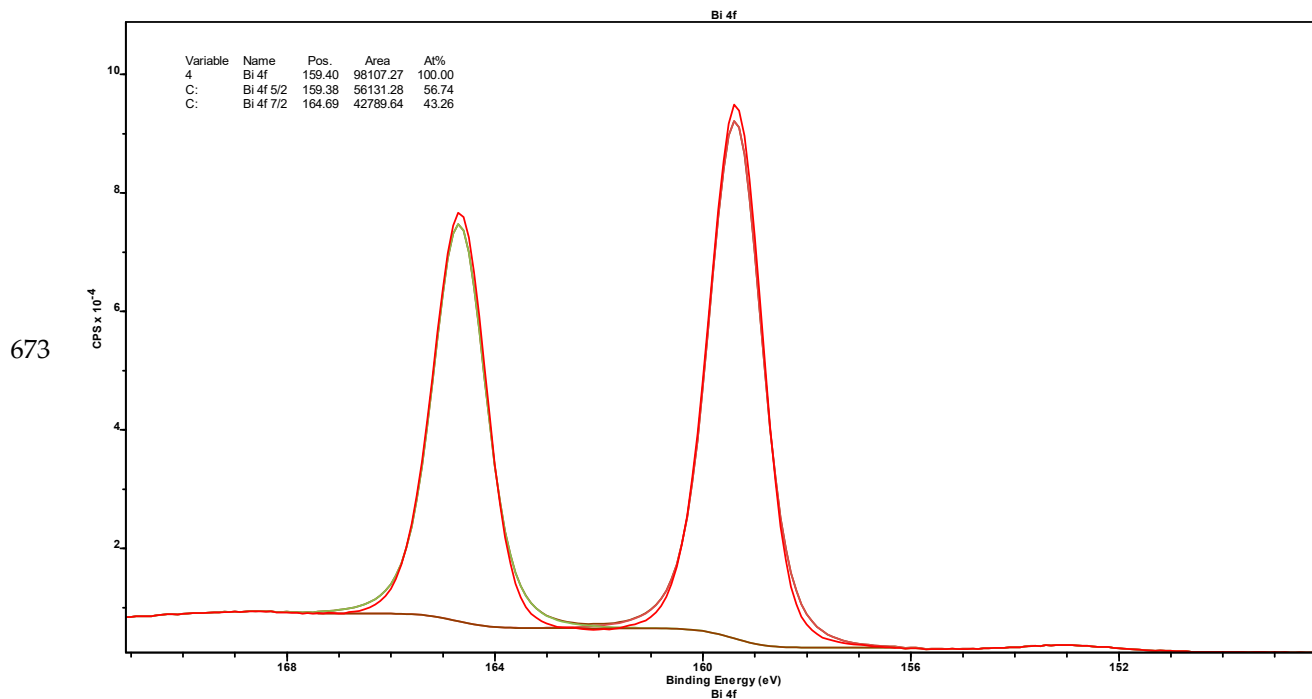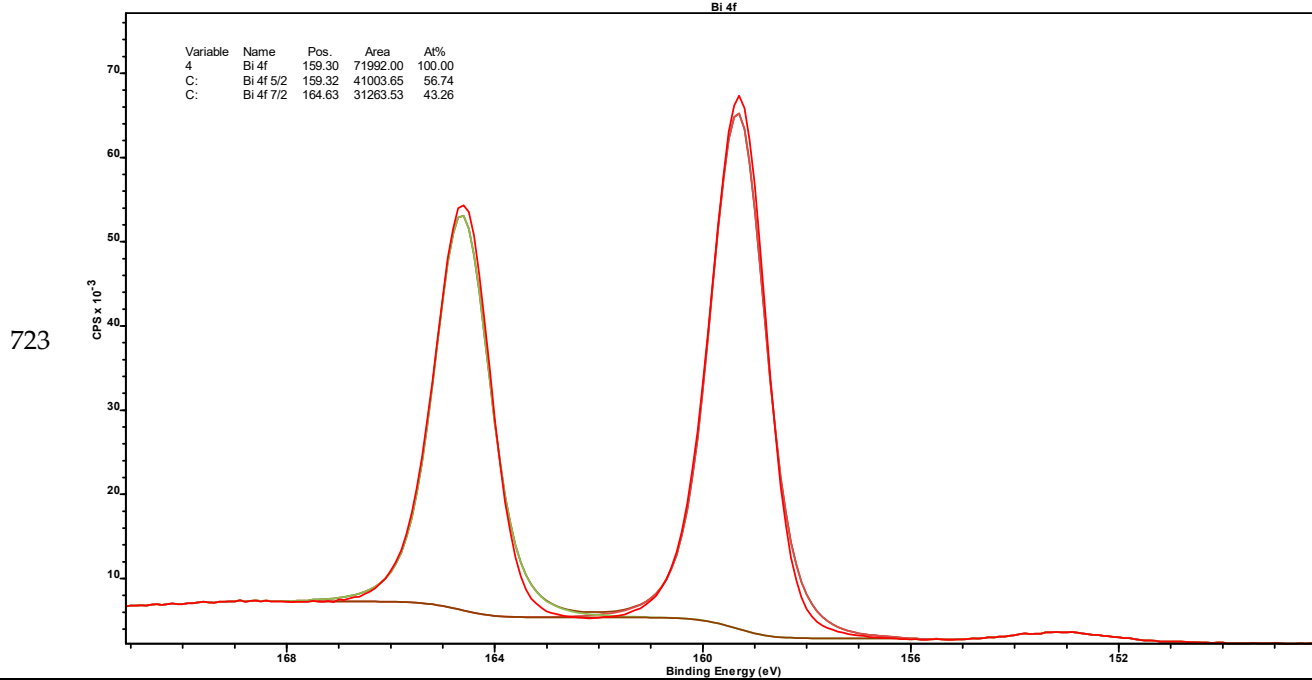

773

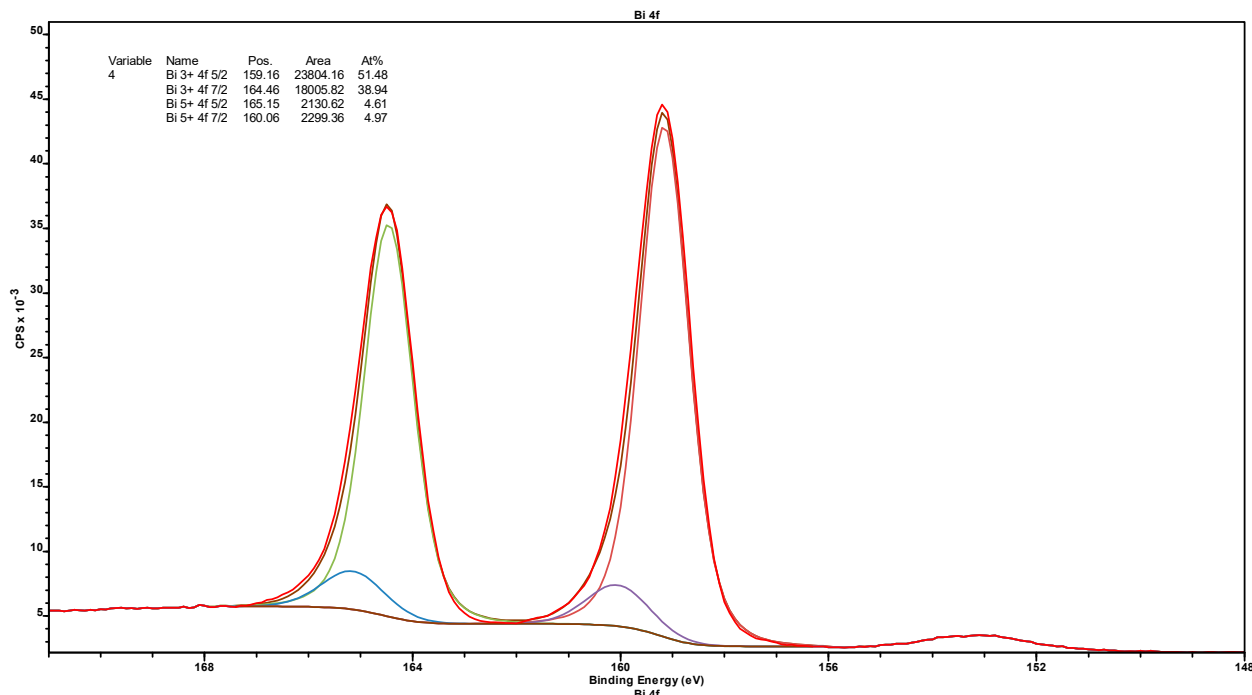

823

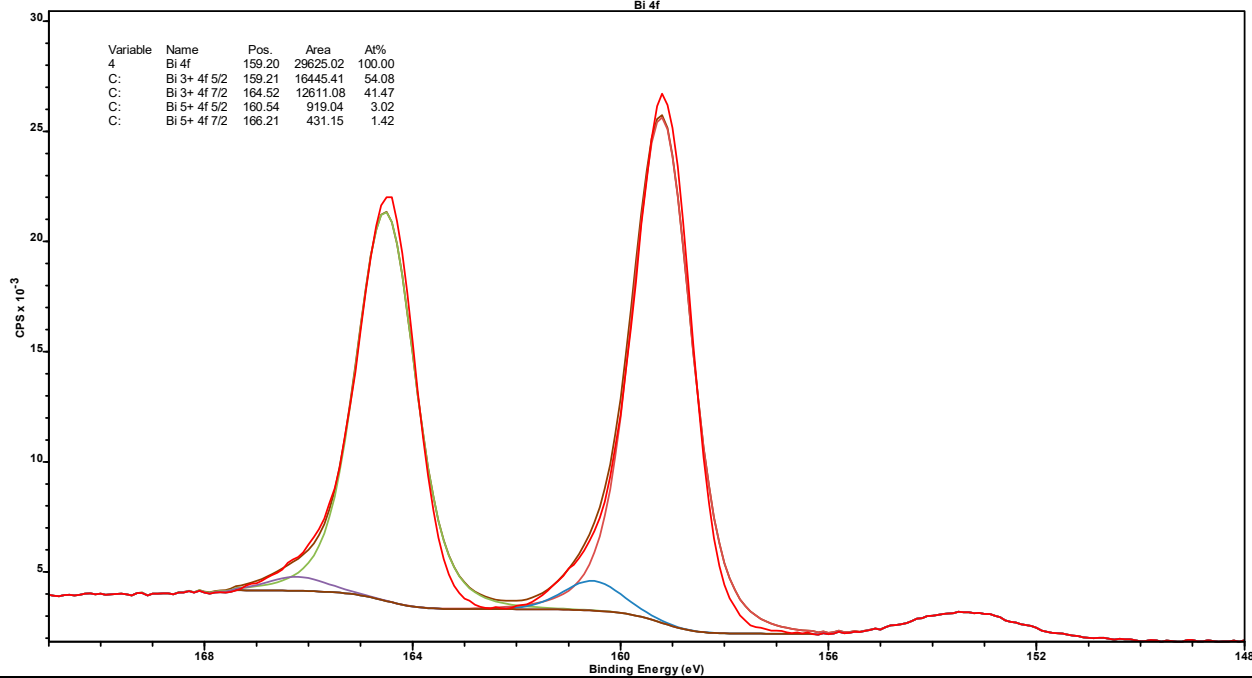

873

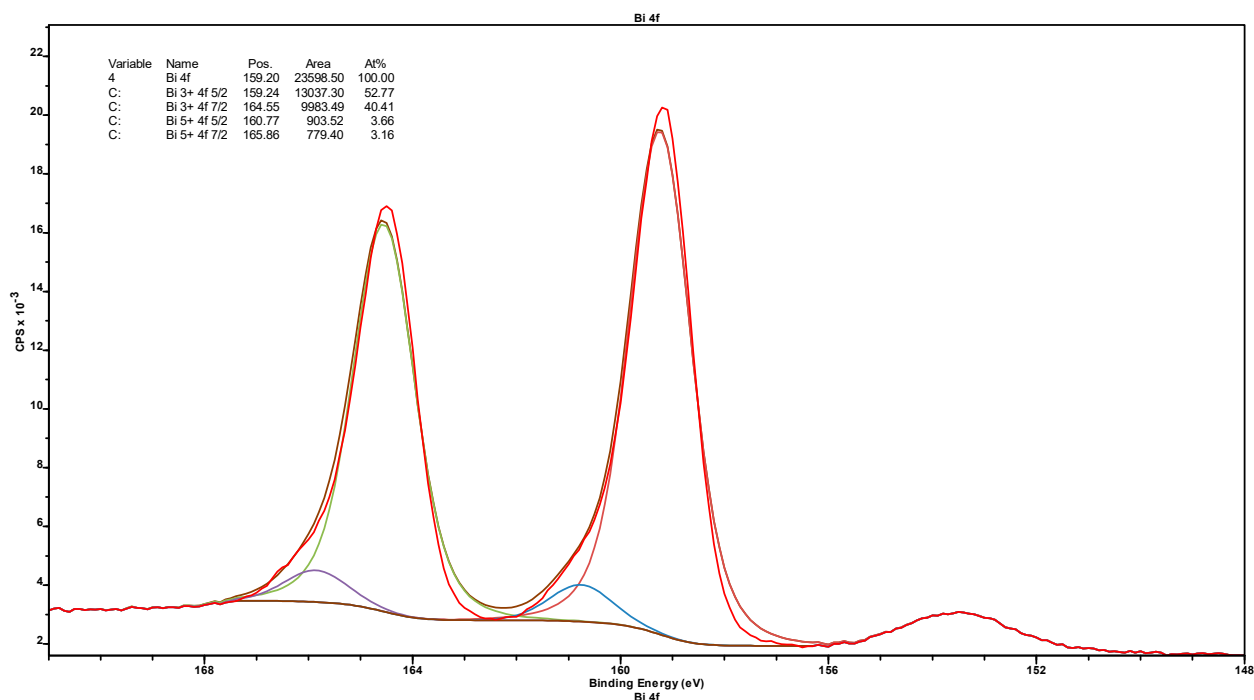

923

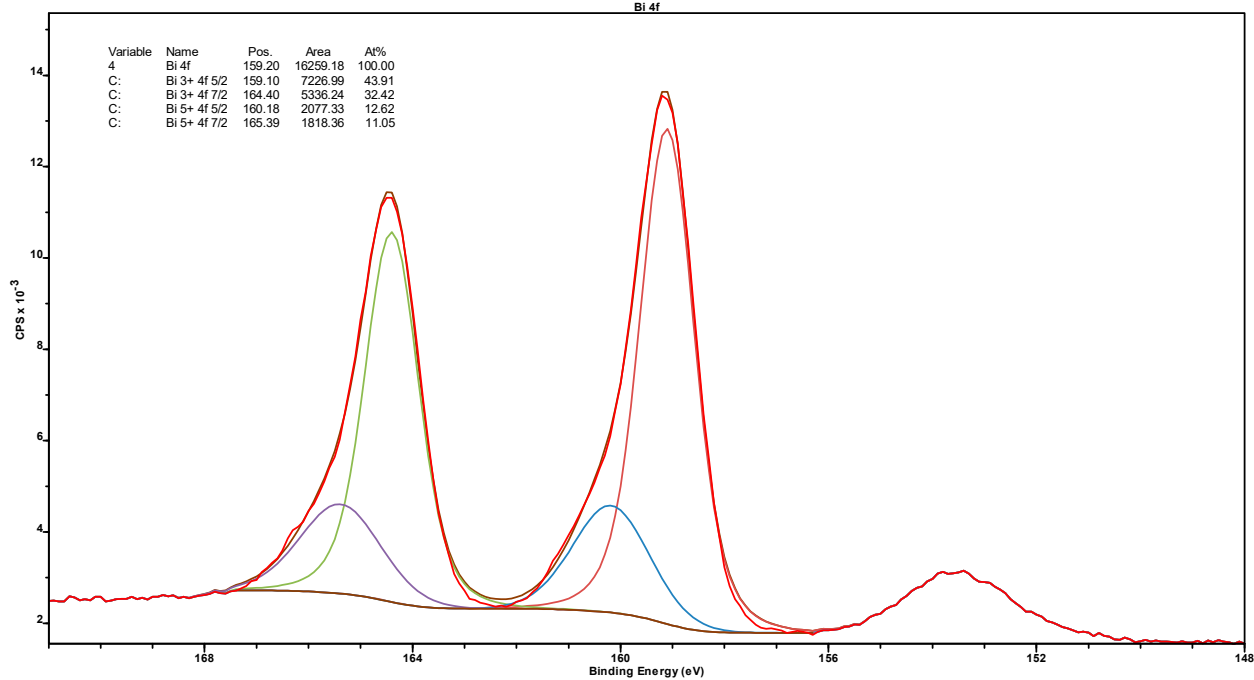

T  
(K)

O 1s

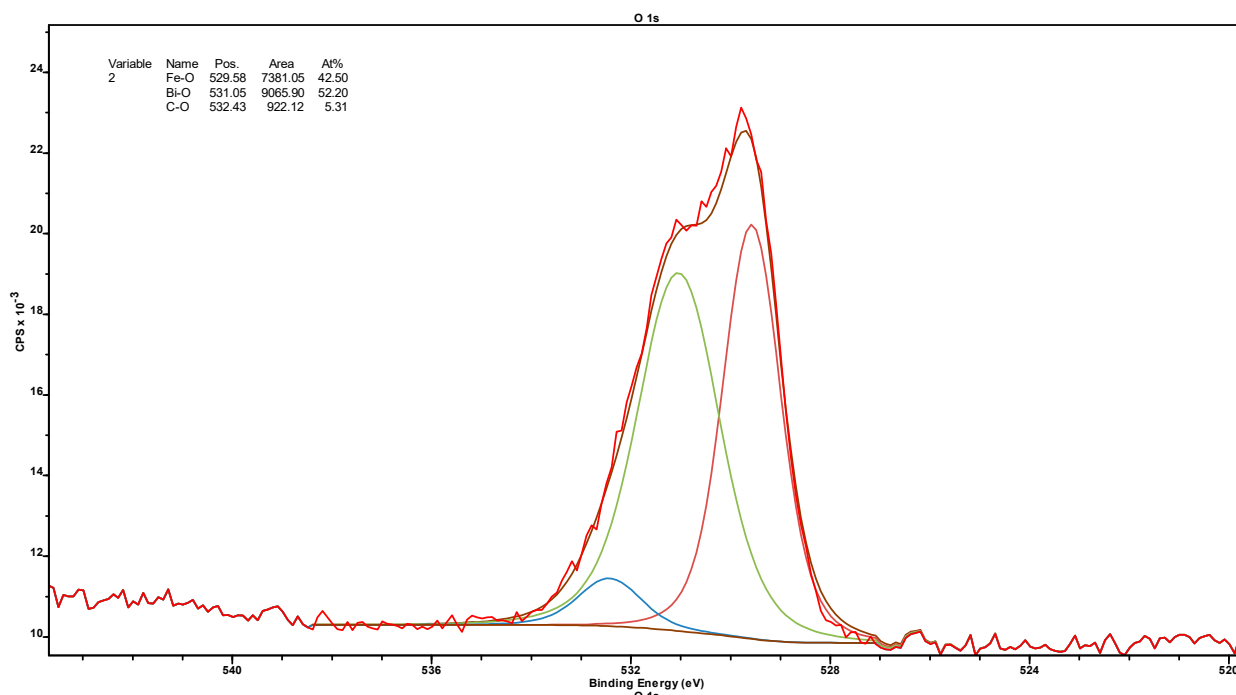

300

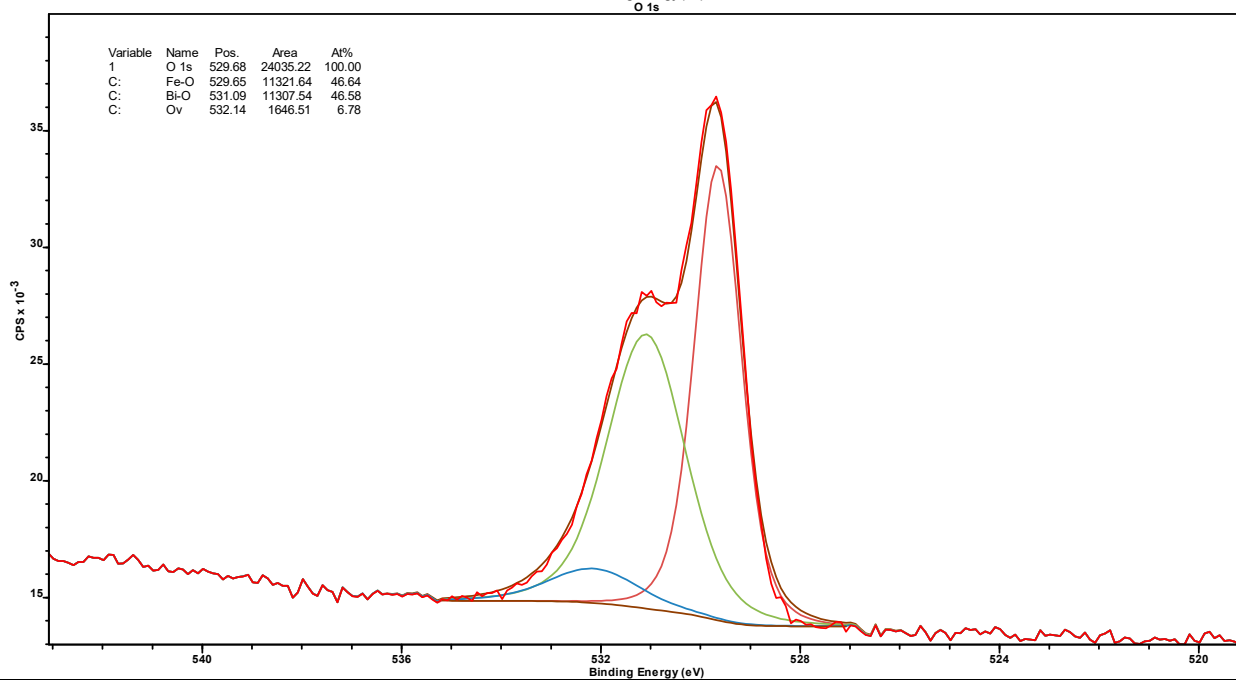

373

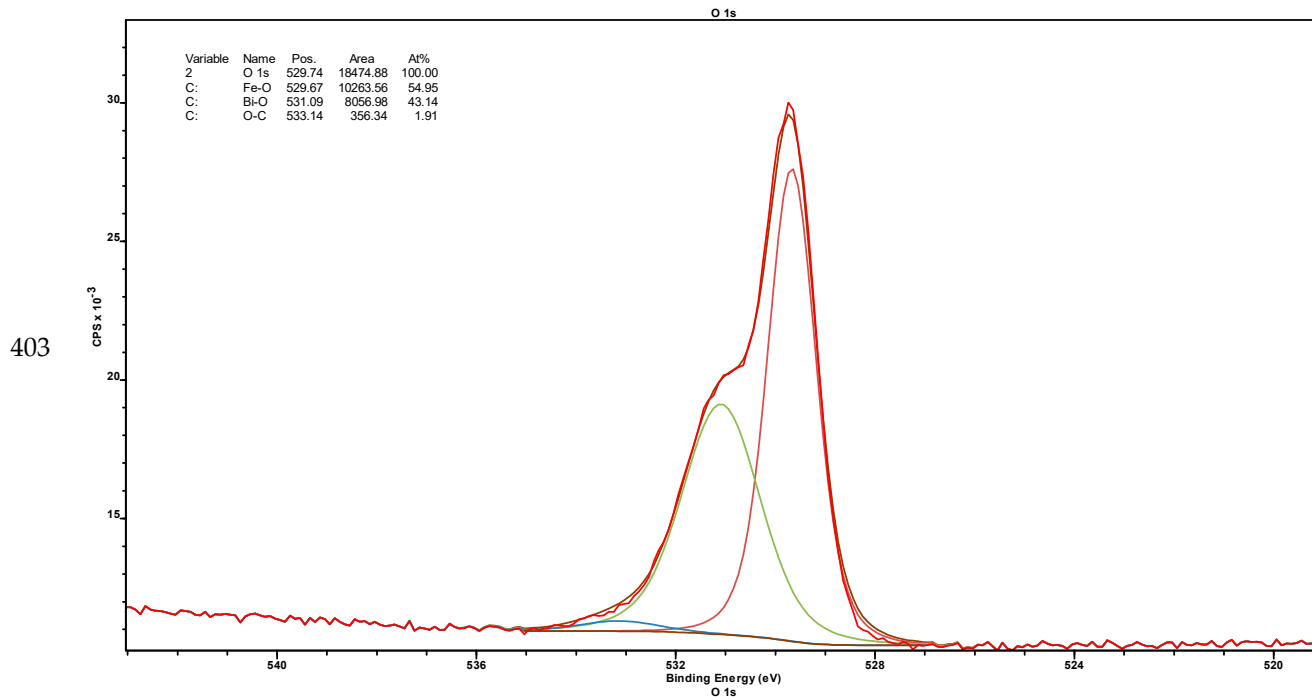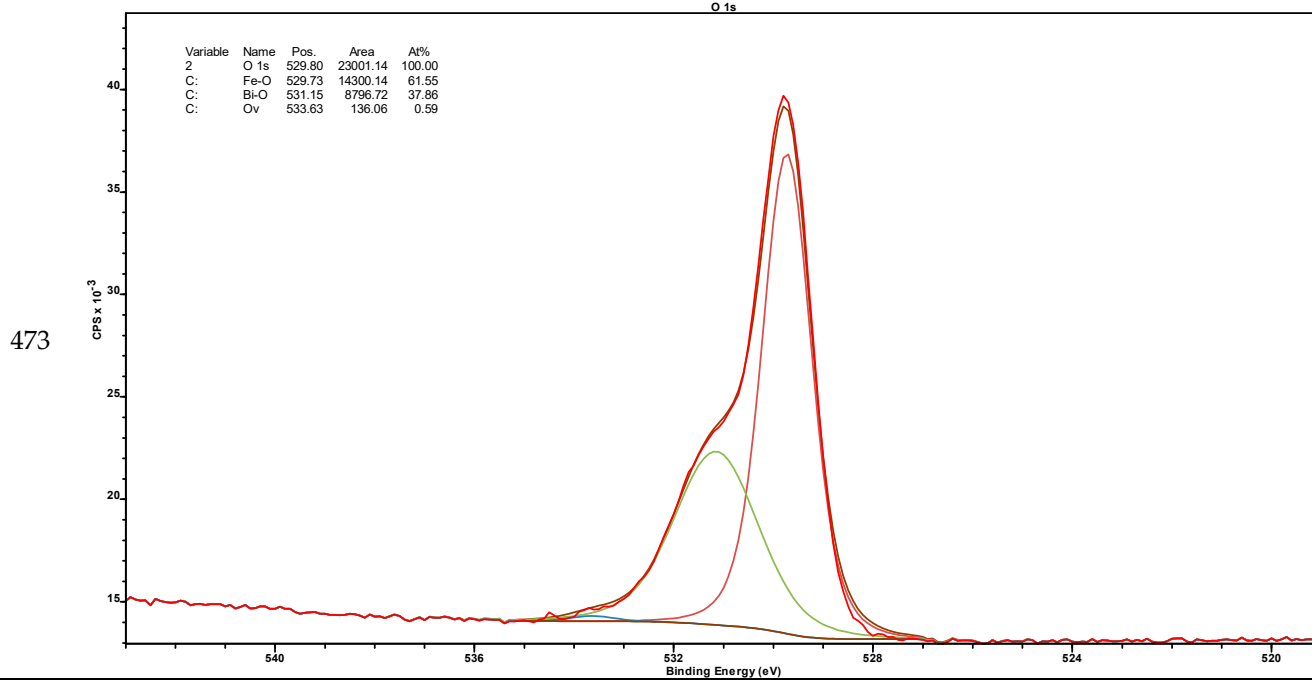

573

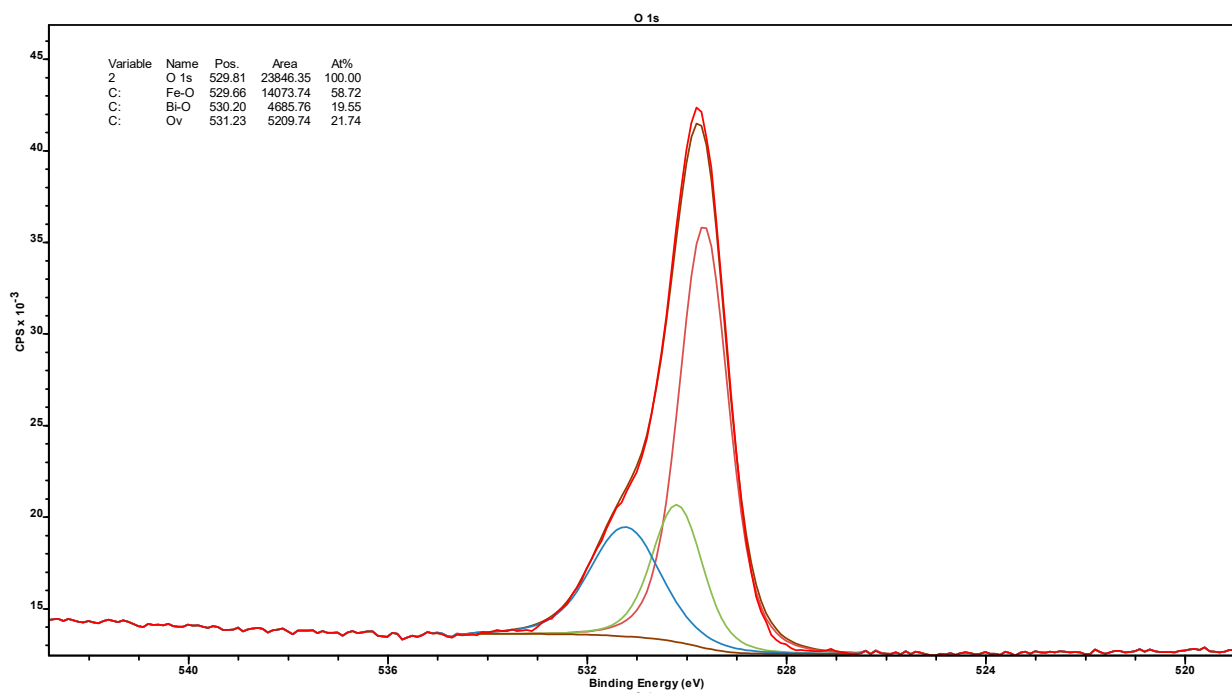

623

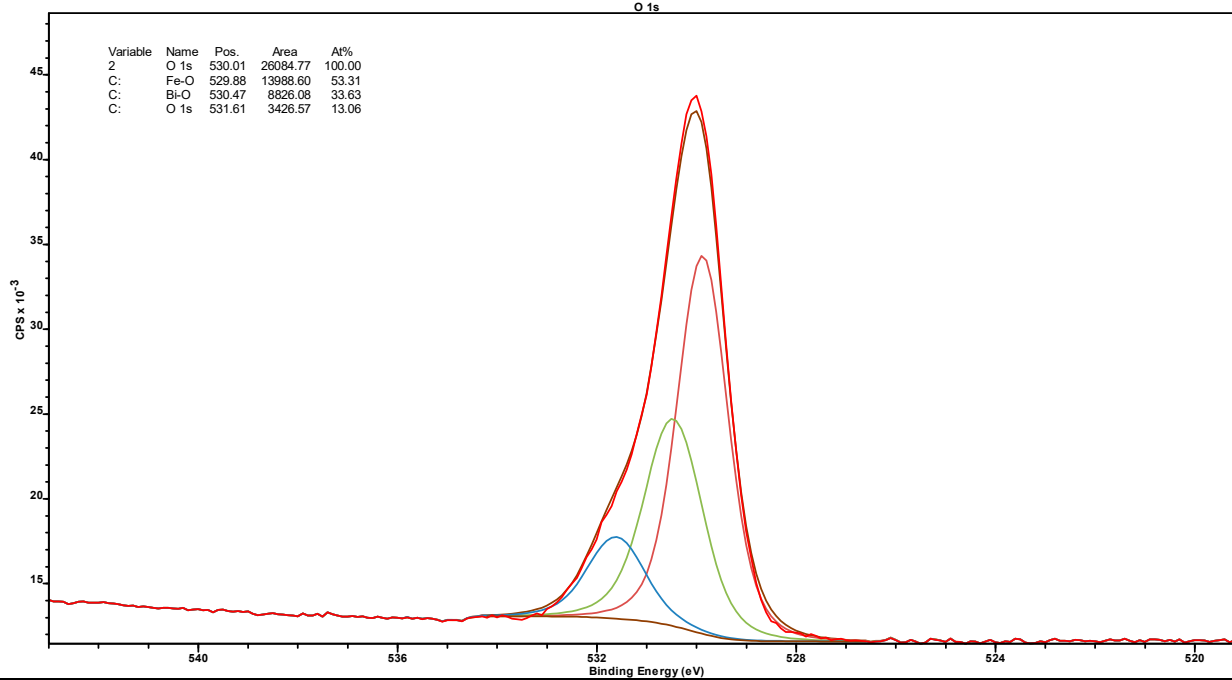



673

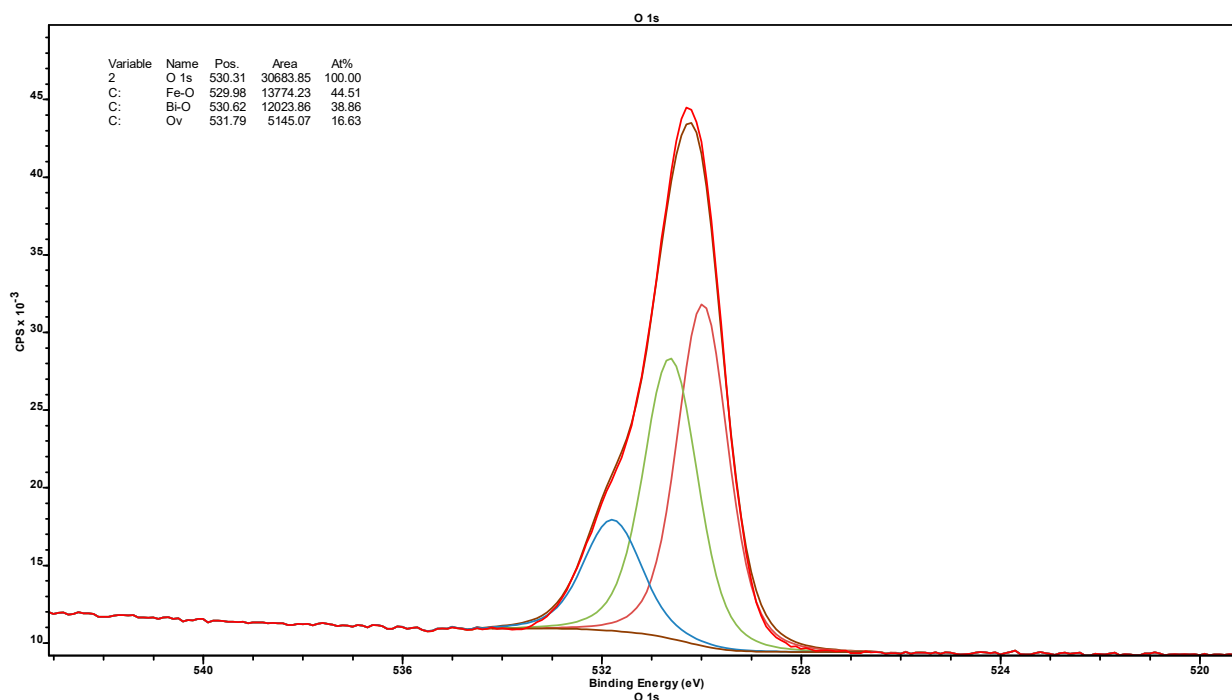

723

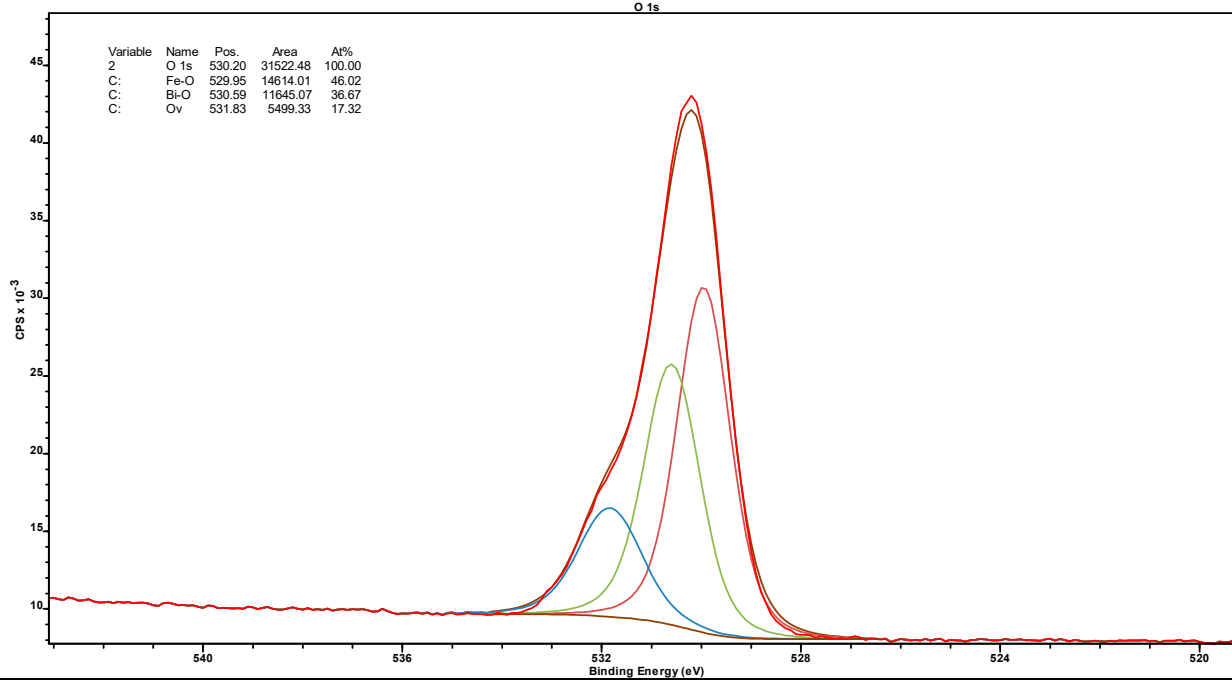

773

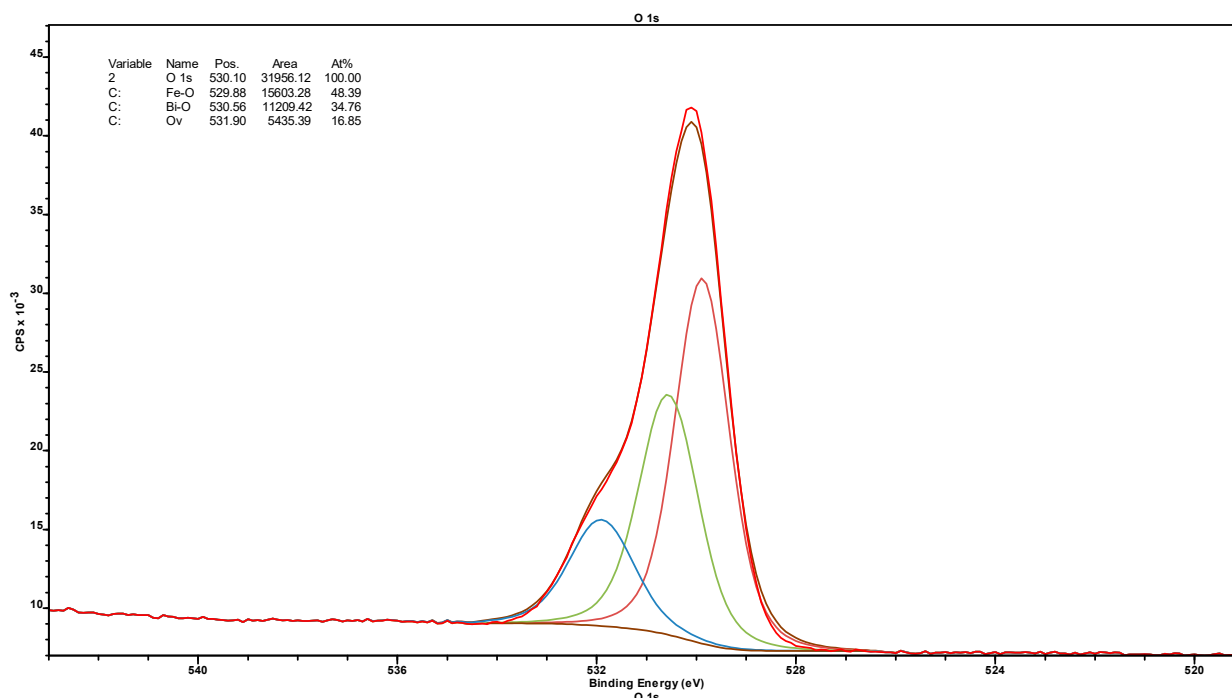

823

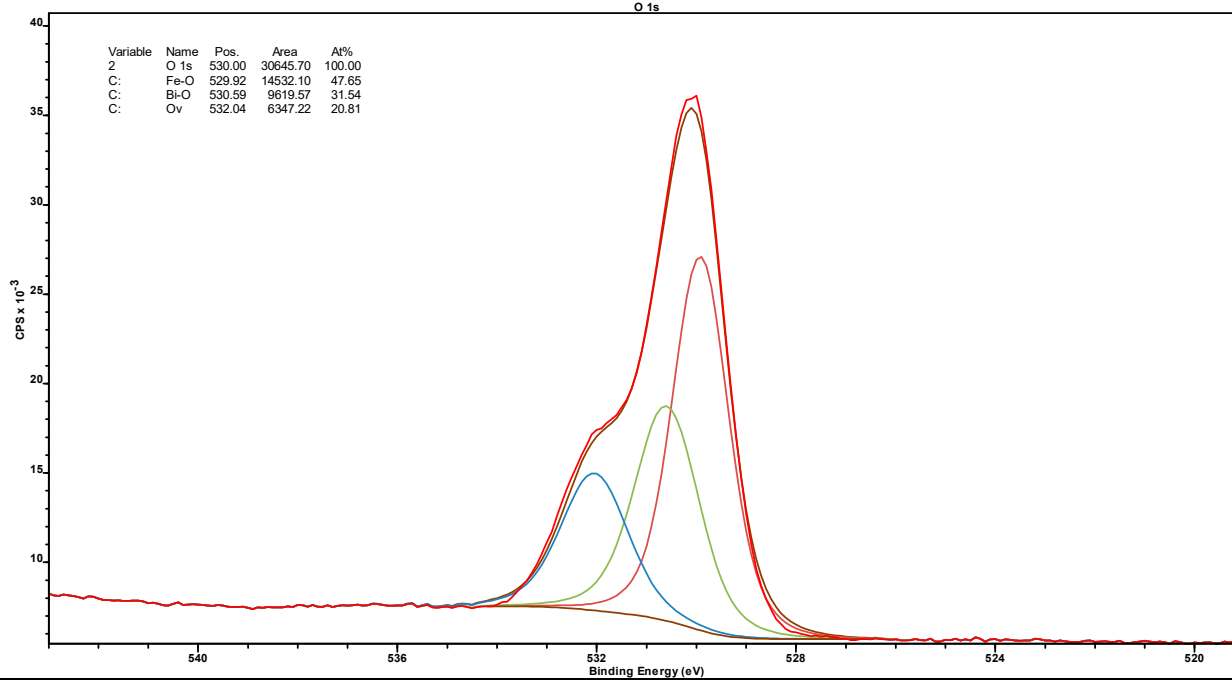

873

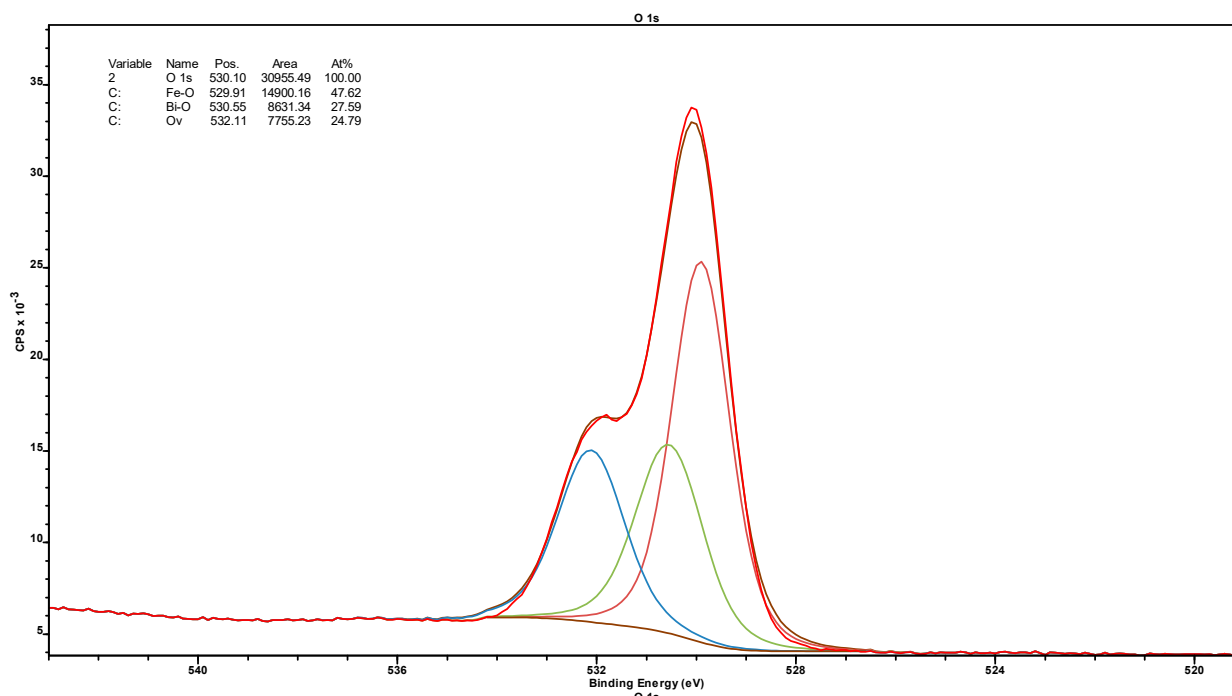

923

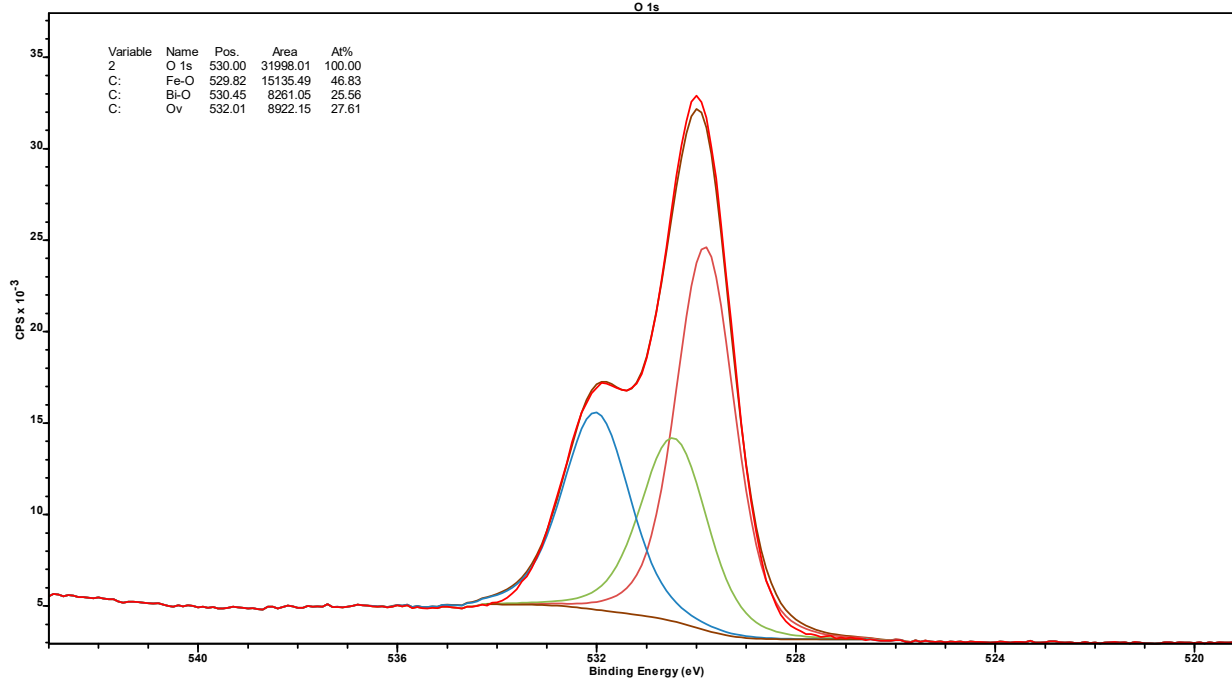

T  
(K)

C 1s

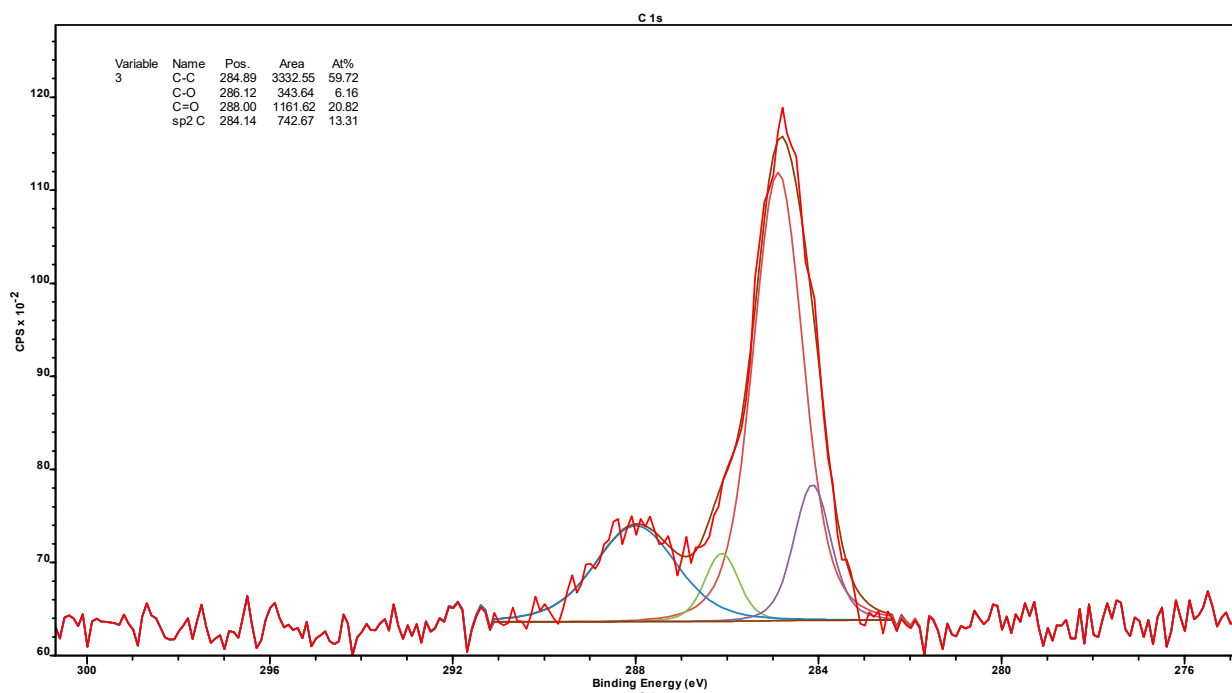

300

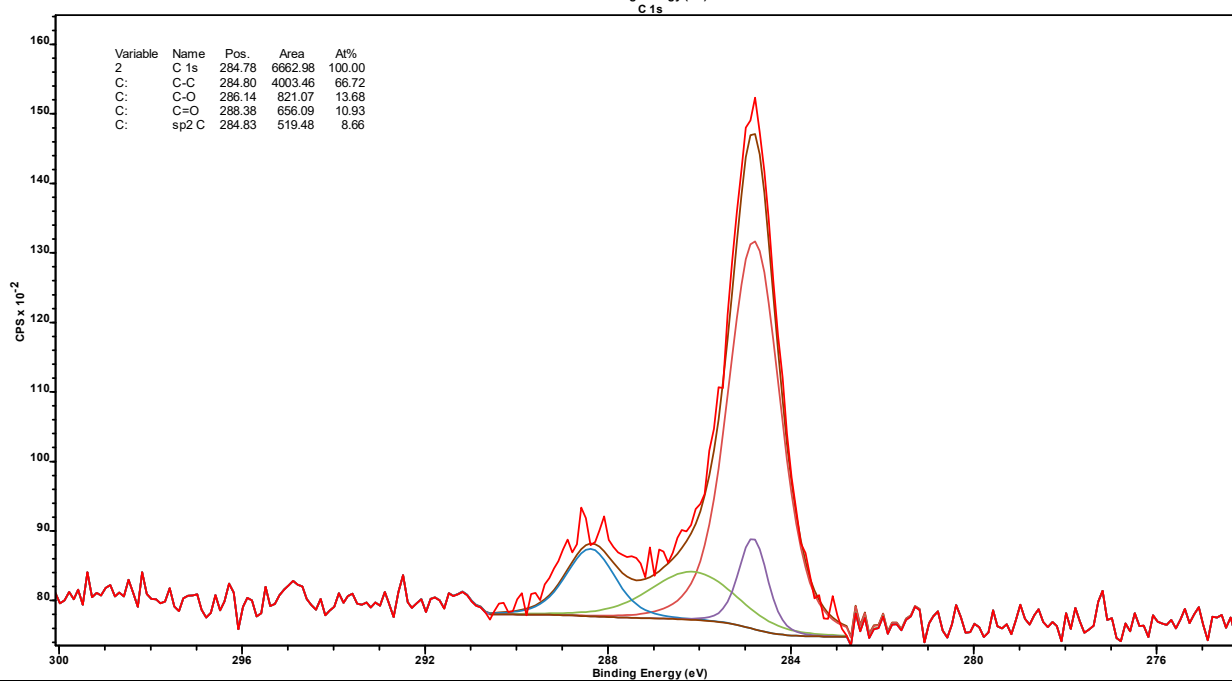

373

403

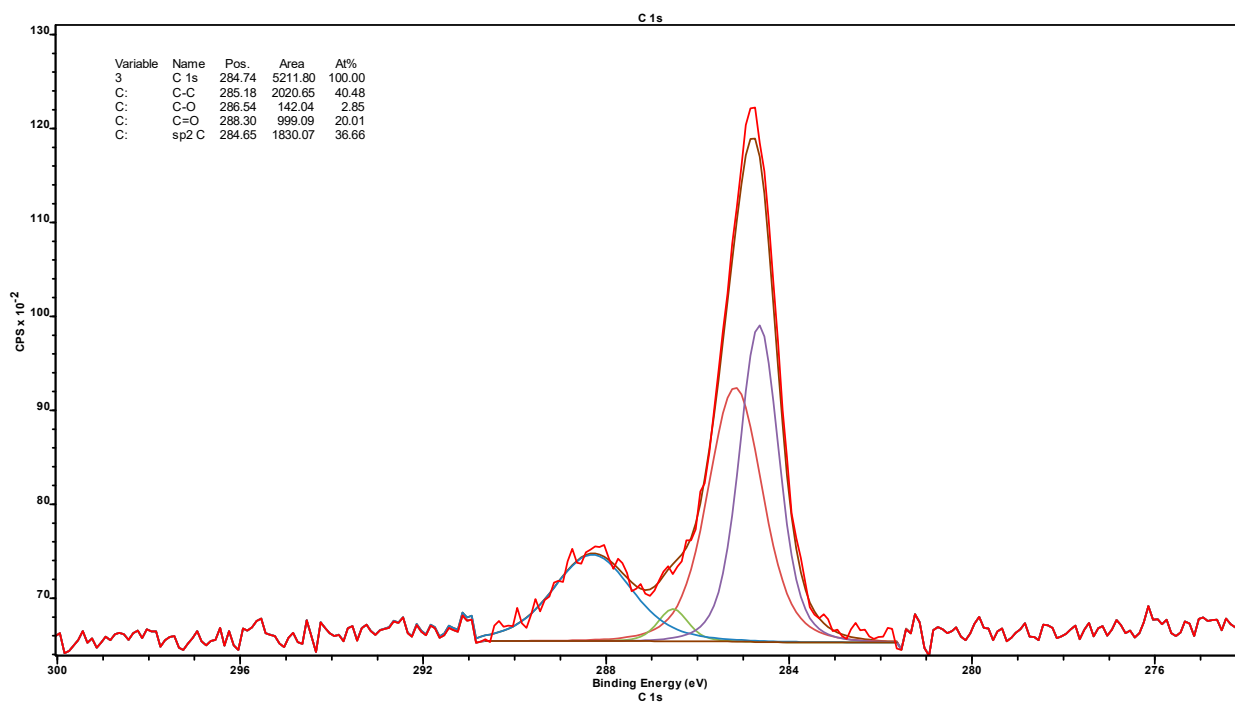

473

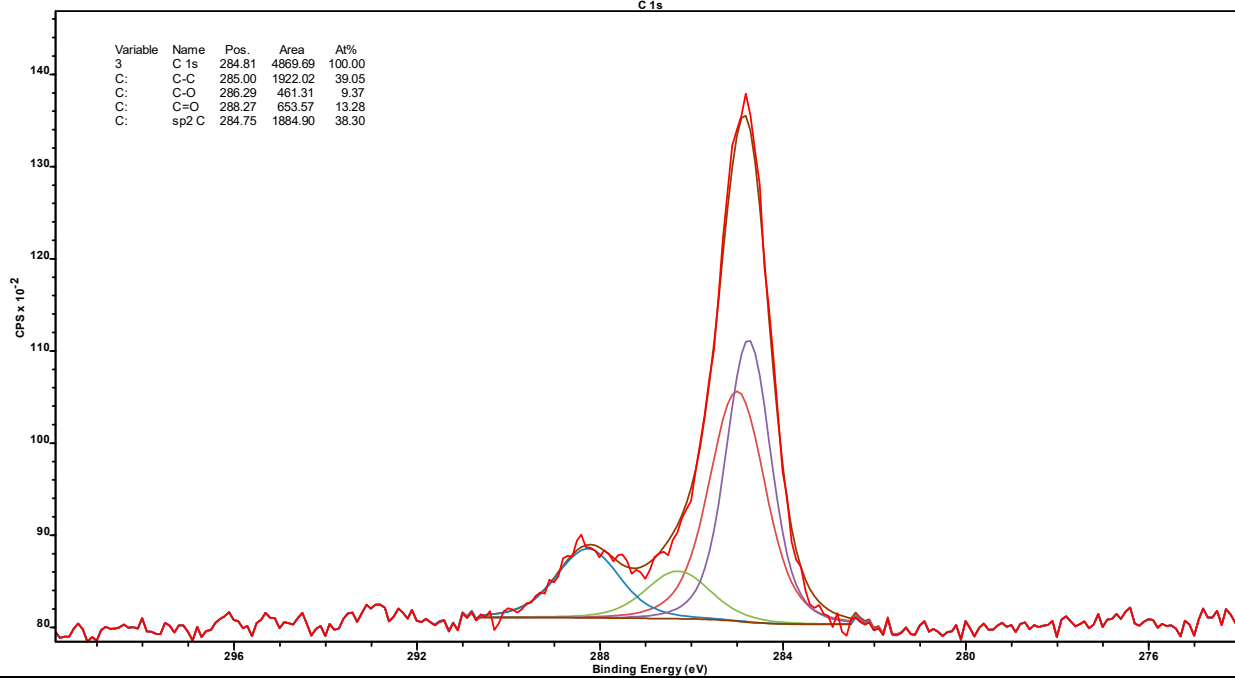

573

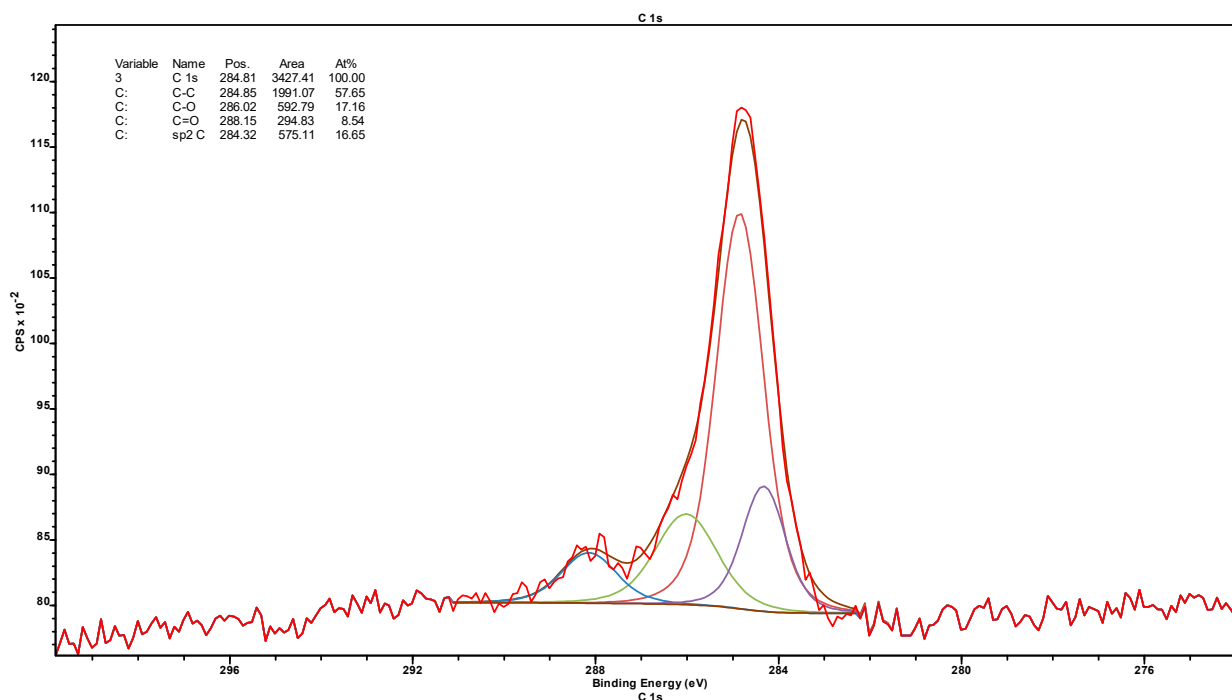

623

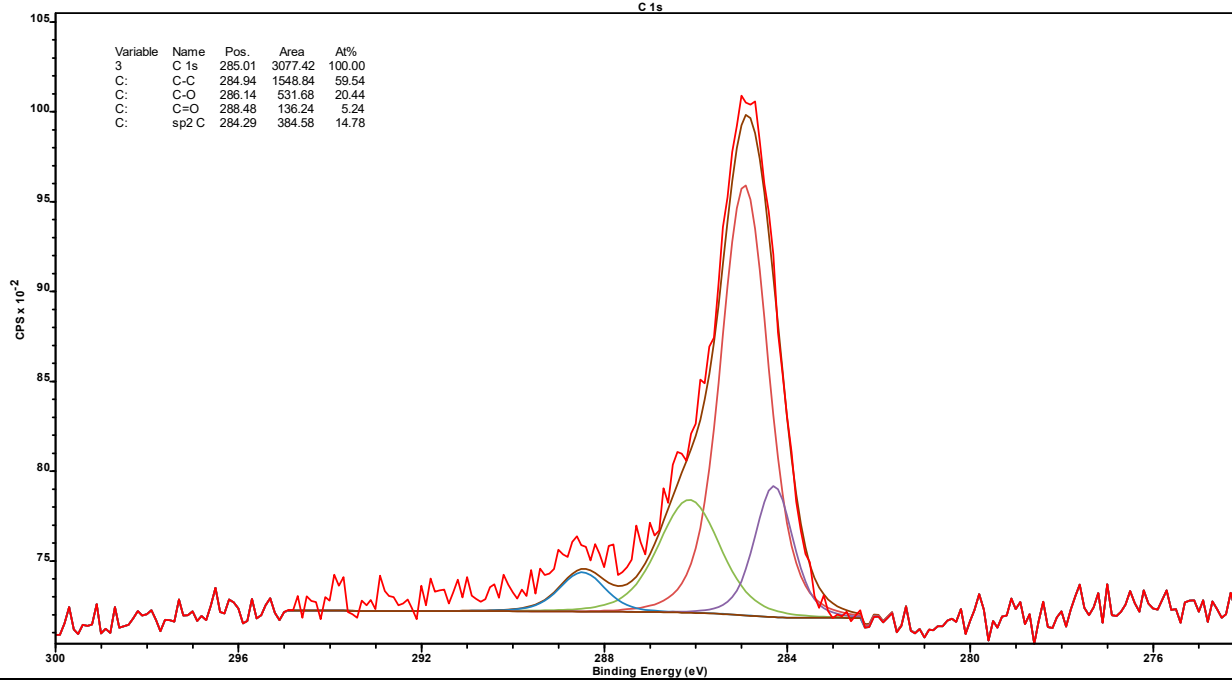

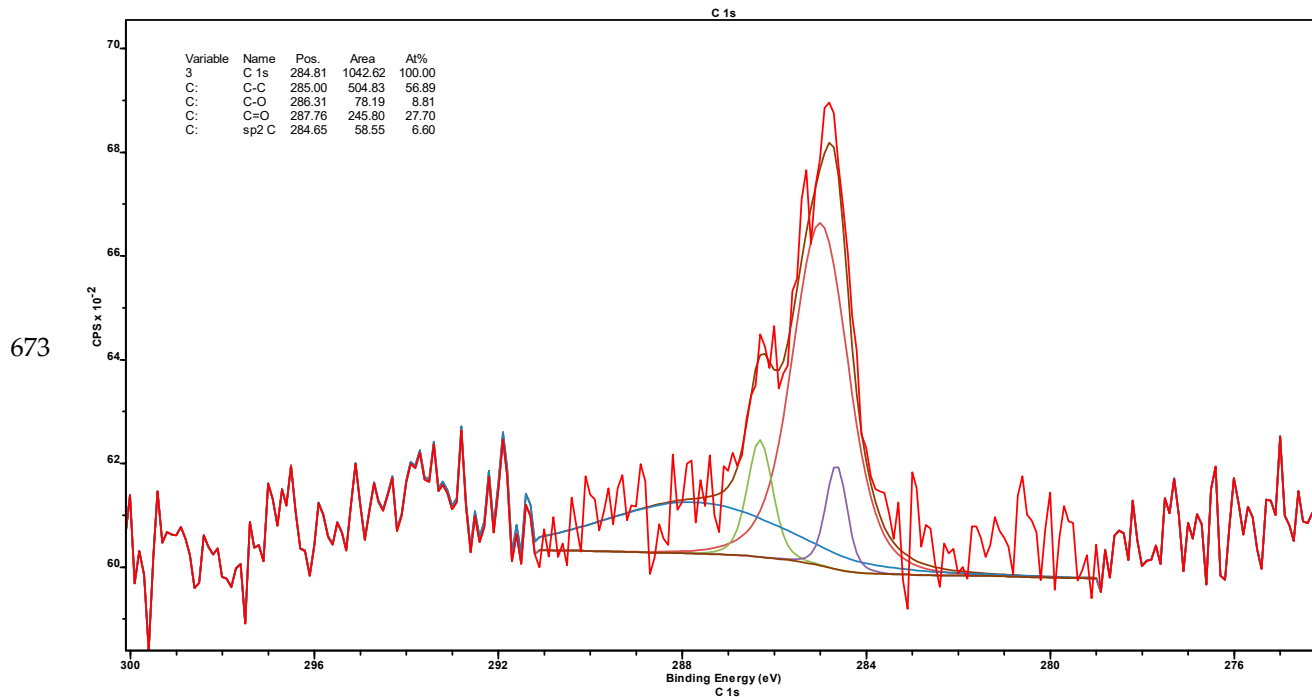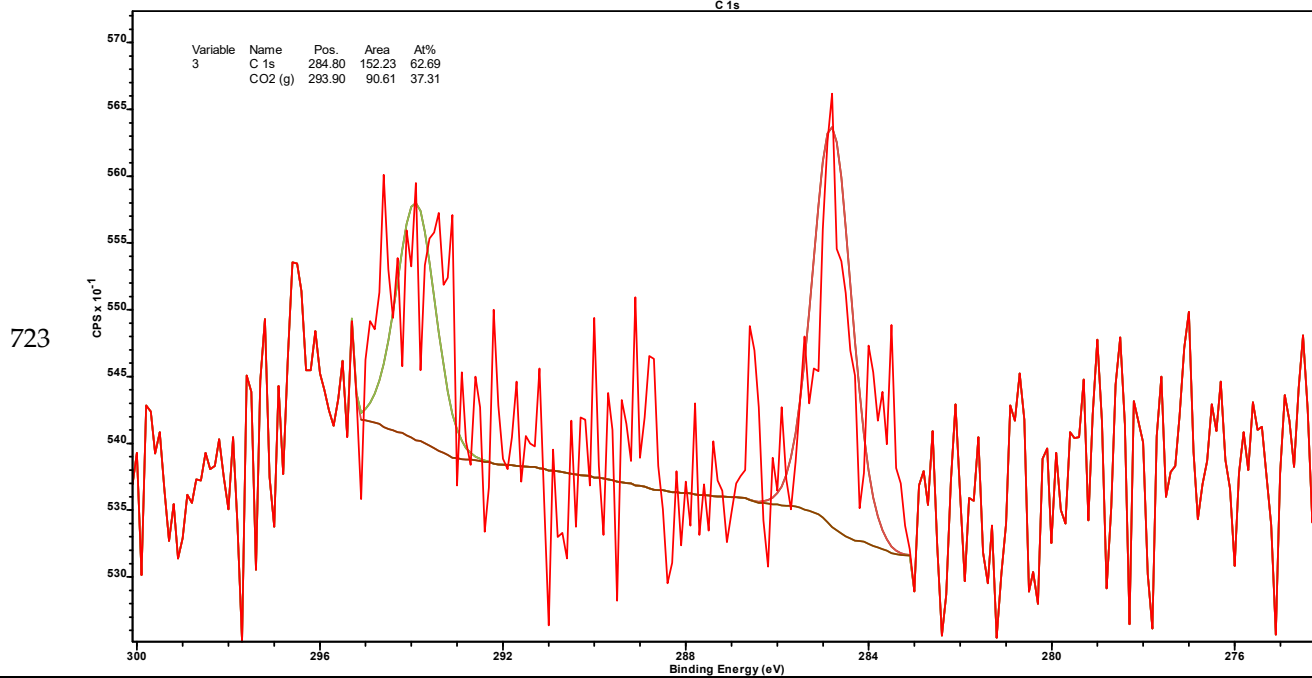

773

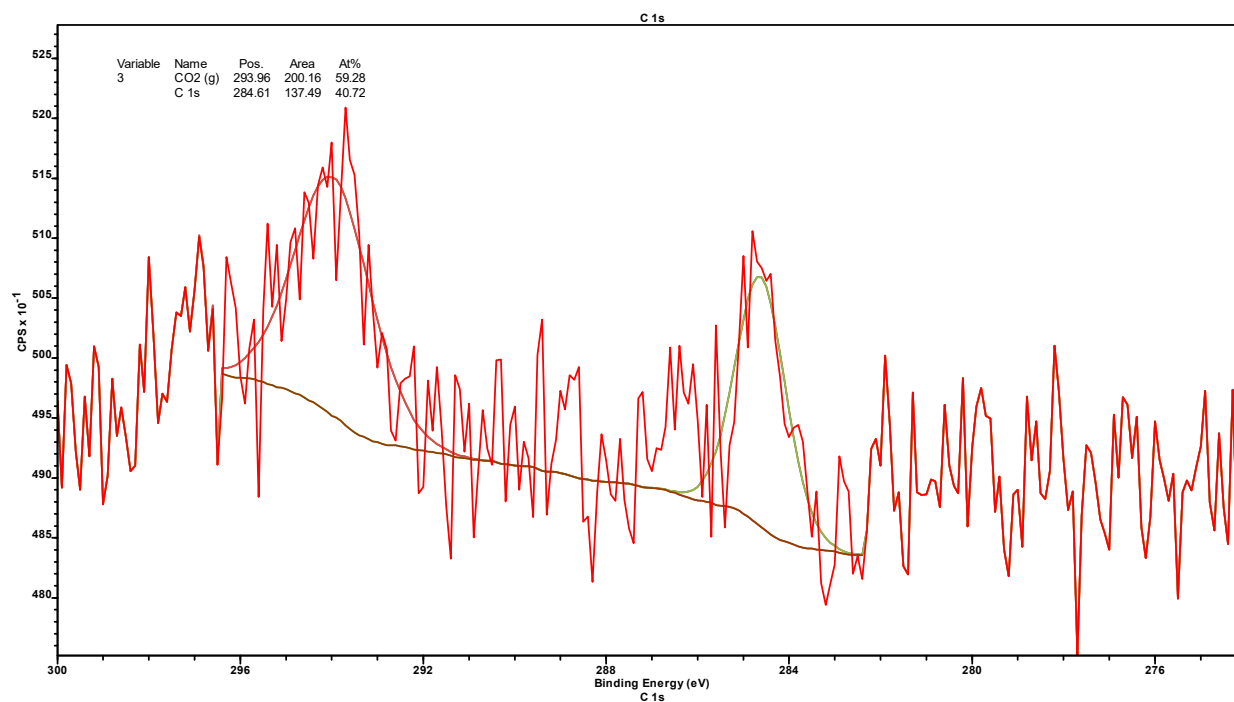

823

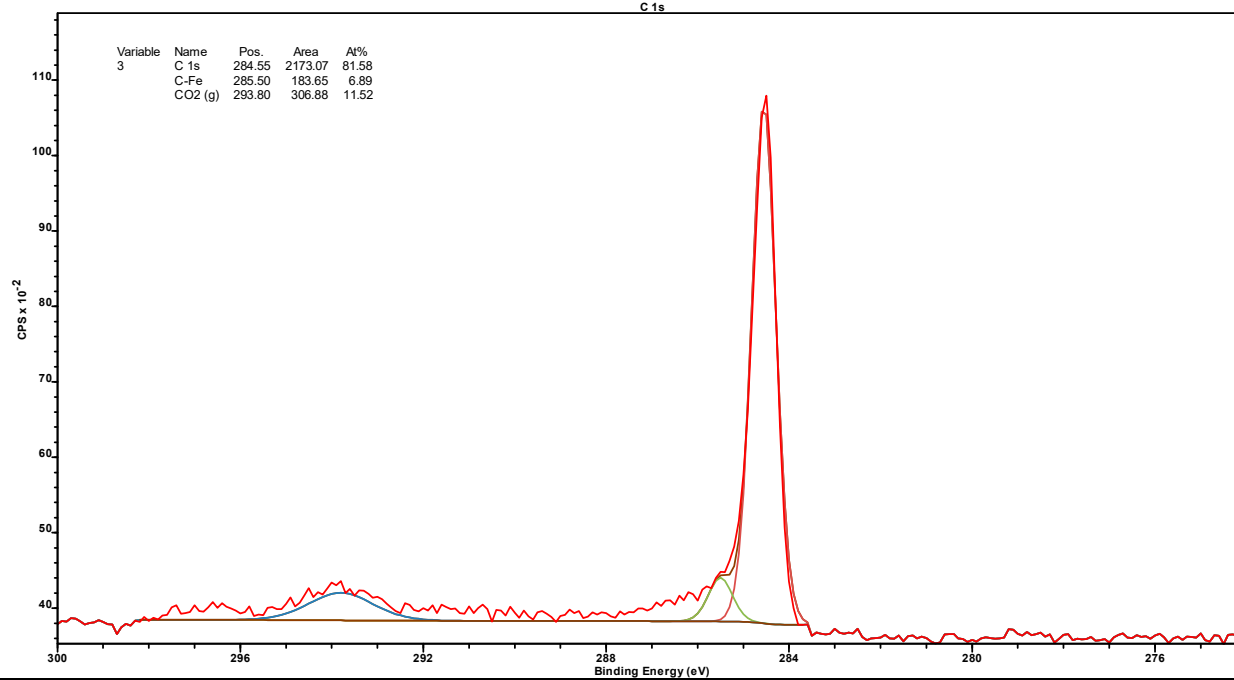



873

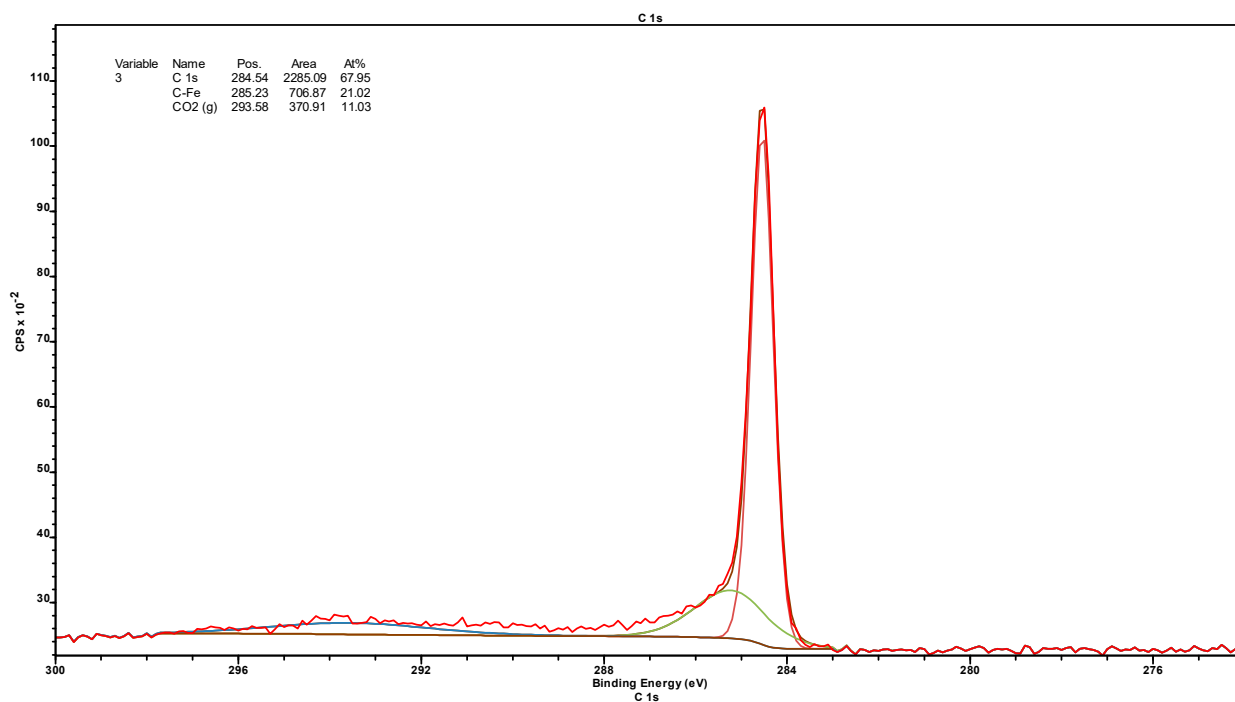

923

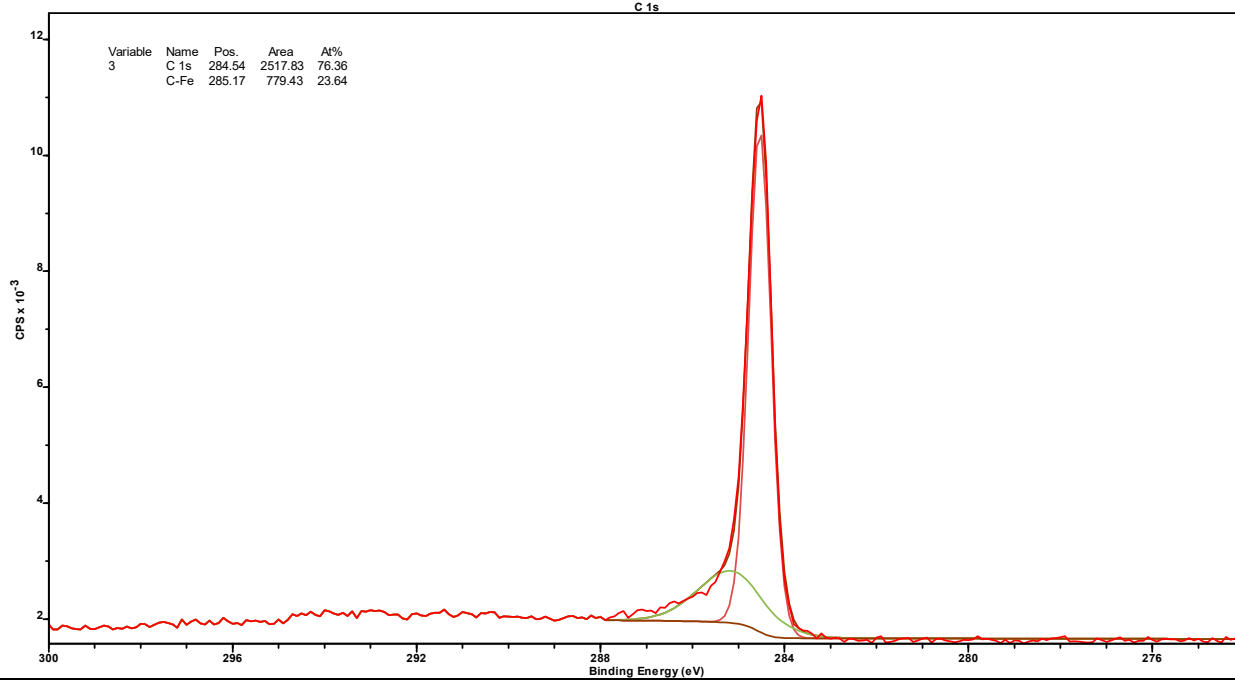

Supplement: nanomaterials-10-01990-s001.pdf [file nanomaterials-10-01990-s001.pdf]
